# Supplementary material
Source: PubMed Central journal article supplement (PMC3938446)
Supplement: halms705829-supplement_2.pdf [file halms705829-supplement_2.pdf]

| ID        | Gene      | Name                                                                | HCVpp<br>(fold change) | HCVpp<br>(fdr) | HCVpp<br>(P-value) | VSVpp<br>(fold change) | VSVpp<br>(fdr) |
|-----------|-----------|---------------------------------------------------------------------|------------------------|----------------|--------------------|------------------------|----------------|
| NM_022158 | FN3K      | fructosamine 3 kinase                                               | -65,79                 | 1,73E-07       | 6,68E-12           | -10,39                 | 8,26E-03       |
| NM_006383 | CIB2      | calcium and integrin binding family member 2                        | -17,68                 | 6,36E-07       | 5,87E-10           | -3,23                  | 8,26E-03       |
| NM_005881 | BCKDK     | branched chain ketoacid dehydrogenase kinase                        | -13,16                 | 6,36E-07       | 2,74E-09           | -6,01                  | 8,26E-03       |
| NM_033116 | NEK9      | NIMA (never in mitosis gene a)- related kinase 9                    | -10,98                 | 6,36E-07       | 7,36E-09           | -9,24                  | 8,26E-03       |
| NM_030906 | STK33     | serine/threonine kinase 33                                          | -11,23                 | 6,36E-07       | 8,05E-09           | -2,61                  | 1,86E-02       |
| NM_004333 | BRAF      | v-raf murine sarcoma viral oncogene homolog B1                      | -13,34                 | 7,70E-07       | 9,10E-09           | -3,16                  | 8,26E-03       |
| NM_052841 | STK22C    | serine/threonine kinase 22C (spermiogenesis associated)             | -10,18                 | 1,06E-06       | 1,17E-08           | -4,62                  | 8,26E-03       |
| NM_018425 | PI4KII    | phosphatidylinositol 4-kinase type II                               | -9,49                  | 1,06E-06       | 1,94E-08           | -3,67                  | 8,26E-03       |
| NM_031480 | RIOK1     | RIO kinase 1 (yeast)                                                | -9,02                  | 1,06E-06       | 2,70E-08           | -6,11                  | 8,26E-03       |
| NM_001823 | CKB       | creatine kinase, brain                                              | -15,80                 | 1,06E-06       | 2,90E-08           | -4,83                  | 2,16E-02       |
| NM_030974 | Sharpin   | shank-interacting protein-like 1                                    | -8,50                  | 1,06E-06       | 3,35E-08           | -16,57                 | 8,26E-03       |
| NM_031464 | RPS6KL1   | ribosomal protein S6 kinase-like 1                                  | -9,40                  | 1,06E-06       | 3,51E-08           | -10,71                 | 8,26E-03       |
| BF688722  | FLT3LG    | fms-related tyrosine kinase 3 ligand                                | -9,48                  | 1,06E-06       | 3,81E-08           | -2,40                  | 2,02E-02       |
| NM_005734 | HIPK3     | homeodomain interacting protein kinase 3                            | -8,48                  | 1,06E-06       | 4,00E-08           | -2,91                  | 3,88E-02       |
| NM_001786 | CDC2      | cell division cycle 2, G1 to S and G2 to M                          | -14,96                 | 1,06E-06       | 4,23E-08           | -10,78                 | 8,26E-03       |
| NM_005235 | ERBB4     | v-erb-a erythroblastic leukemia viral oncogene homolog 4 (avian)    | -9,01                  | 1,06E-06       | 4,65E-08           | -3,35                  | 8,26E-03       |
| NM_001278 | CHUK      | conserved helix-loop-helix ubiquitous kinase                        | -8,11                  | 1,06E-06       | 5,13E-08           | -1,53                  | 9,16E-02       |
| NM_033487 | CDC2L1    | cell division cycle 2-like 1 (PITSLRE proteins)                     | -8,13                  | 1,06E-06       | 5,43E-08           | -5,76                  | 8,26E-03       |
| NM_024594 | PANK3     | pantothenate kinase 3                                               | -8,33                  | 1,06E-06       | 5,55E-08           | -2,84                  | 1,47E-02       |
| NM_030623 | SKIP      | SPHK1 (sphingosine kinase type 1) interacting protein               | -8,16                  | 1,06E-06       | 5,88E-08           | -9,15                  | 8,26E-03       |
| NM_001798 | CDK2      | cyclin-dependent kinase 2                                           | -8,81                  | 1,35E-06       | 6,14E-08           | -1,66                  | 9,16E-02       |
| NM_006575 | MAP4K5    | mitogen-activated protein kinase kinase kinase kinase 5             | -7,75                  | 1,35E-06       | 6,87E-08           | -2,64                  | 8,26E-03       |
| NM_000051 | ATM       | ataxia telangiectasia mutated (includes complementation groups A    | -12,78                 | 1,71E-06       | 7,05E-08           | -3,38                  | 3,88E-02       |
| NM_000075 | CDK4      | cyclin-dependent kinase 4                                           | -9,76                  | 4,10E-06       | 7,62E-08           | -3,93                  | 1,86E-02       |
| NM_020836 | KIAA1446  | brain-enriched guanylate kinase-associated protein                  | -7,50                  | 7,32E-06       | 8,99E-08           | -5,46                  | 8,26E-03       |
| NM_017593 | BMP2K     | BMP2 inducible kinase                                               | -7,06                  | 9,22E-06       | 1,14E-07           | -2,94                  | 3,19E-02       |
| NM_001721 | BMX       | BMX non-receptor tyrosine kinase                                    | -6,68                  | 9,22E-06       | 1,75E-07           | -1,94                  | 2,38E-02       |
| NM_006742 | PSKH1     | protein serine kinase H1                                            | -6,74                  | 1,34E-05       | 1,76E-07           | -1,47                  | 7,71E-02       |
| NM_001260 | CDK8      | cyclin-dependent kinase 8                                           | -6,36                  | 1,34E-05       | 2,24E-07           | -2,11                  | 2,16E-02       |
| NM_004080 | DGKB      | diacylglycerol kinase, beta 90kDa                                   | -6,25                  | 1,48E-05       | 2,66E-07           | -1,58                  | 7,71E-02       |
| NM_005781 | TNK2      | tyrosine kinase, non-receptor, 2                                    | -7,04                  | 1,48E-05       | 3,21E-07           | -2,99                  | 8,26E-03       |
| NM_003157 | NEK4      | NIMA (never in mitosis gene a)-related kinase 4                     | -6,05                  | 3,51E-05       | 3,65E-07           | -4,37                  | 8,26E-03       |
| NM_016276 | SGK2      | serum/glucocorticoid regulated kinase 2                             | -5,97                  | 3,51E-05       | 5,27E-07           | -1,35                  | 2,77E-01       |
| NM_005233 | EPHA3     | EPH receptor A3                                                     | -5,29                  | 3,51E-05       | 8,38E-07           | -1,73                  | 7,71E-02       |
| NM_002011 | FGFR4     | fibroblast growth factor receptor 4                                 | -5,31                  | 3,51E-05       | 9,31E-07           | -3,41                  | 8,26E-03       |
| NM_006116 | MAP3K7IP1 | mitogen-activated protein kinase kinase kinase 7 interacting protei | -5,32                  | 3,51E-05       | 9,65E-07           | -2,73                  | 2,72E-02       |
| NM_024117 | MAPKAP1   | mitogen-activated protein kinase associated protein 1               | -5,11                  | 3,51E-05       | 1,06E-06           | -1,78                  | 3,19E-02       |
| NM_005246 | FER       | fer (fps/fes related) tyrosine kinase (phosphoprotein NCP94)        | -5,48                  | 4,07E-05       | 1,07E-06           | -1,49                  | 7,71E-02       |
| NM_001106 | ACVR2B    | activin A receptor, type IIB                                        | -5,23                  | 4,07E-05       | 1,37E-06           | -1,27                  | 3,97E-01       |

|              |           |                                                                      |               |                 |          |              |                 |
|--------------|-----------|----------------------------------------------------------------------|---------------|-----------------|----------|--------------|-----------------|
| BC033792     | NYD-SP25  | protein kinase NYD-SP25                                              | <b>-4,93</b>  | <b>4,07E-05</b> | 1,44E-06 | <b>-4,83</b> | <b>8,26E-03</b> |
| NM_021970    | MAP2K1IP1 | mitogen-activated protein kinase kinase 1 interacting protein 1      | <b>-5,09</b>  | <b>4,07E-05</b> | 1,83E-06 | <b>-1,25</b> | <b>3,97E-01</b> |
| NM_005028    | PIP5K2A   | phosphatidylinositol-4-phosphate 5-kinase, type II, alpha            | <b>-4,85</b>  | <b>4,07E-05</b> | 1,93E-06 | <b>-1,48</b> | <b>7,71E-02</b> |
| NM_005876    | APEG1     | aortic preferentially expressed protein 1                            | <b>-4,80</b>  | <b>4,07E-05</b> | 1,97E-06 | <b>-1,70</b> | <b>7,71E-02</b> |
| NM_014683    | ULK2      | unc-51-like kinase 2 (C. elegans)                                    | <b>-4,64</b>  | <b>4,07E-05</b> | 2,22E-06 | <b>-1,99</b> | <b>4,87E-02</b> |
| NM_016203    | PRKAG2    | protein kinase, AMP-activated, gamma 2 non-catalytic subunit         | <b>-4,72</b>  | <b>4,07E-05</b> | 2,22E-06 | <b>-2,17</b> | <b>2,38E-02</b> |
| NM_004755    | RPS6KA5   | ribosomal protein S6 kinase, 90kDa, polypeptide 5                    | <b>-4,60</b>  | <b>4,07E-05</b> | 2,36E-06 | <b>-1,32</b> | <b>2,61E-01</b> |
| NM_005030    | PLK1      | polo-like kinase 1 (Drosophila)                                      | <b>-10,83</b> | <b>4,07E-05</b> | 2,49E-06 | <b>-6,40</b> | <b>4,31E-02</b> |
| NM_173176    | PTK2B     | PTK2B protein tyrosine kinase 2 beta                                 | <b>-4,58</b>  | <b>4,07E-05</b> | 2,58E-06 | <b>-1,49</b> | <b>2,21E-01</b> |
| NM_002220    | ITPKA     | inositol 1,4,5-trisphosphate 3-kinase A                              | <b>-4,75</b>  | <b>4,07E-05</b> | 2,63E-06 | <b>1,05</b>  | <b>1,00E+00</b> |
| NM_000162    | GCK       | glucokinase (hexokinase 4, maturity onset diabetes of the young 2    | <b>-5,54</b>  | <b>4,07E-05</b> | 2,87E-06 | <b>-2,57</b> | <b>7,71E-02</b> |
| NM_052853    | ADCK2     | aarF domain containing kinase 2                                      | <b>-4,57</b>  | <b>4,07E-05</b> | 3,01E-06 | <b>-2,96</b> | <b>3,88E-02</b> |
| NM_004327    | BCR       | breakpoint cluster region                                            | <b>-4,55</b>  | <b>4,07E-05</b> | 3,03E-06 | <b>-1,38</b> | <b>2,61E-01</b> |
| NM_002227    | JAK1      | Janus kinase 1 (a protein tyrosine kinase)                           | <b>-5,21</b>  | <b>4,81E-05</b> | 3,11E-06 | <b>-1,76</b> | <b>3,88E-02</b> |
| NM_005228    | EGFR      | epidermal growth factor receptor (erythroblastic leukemia viral (v-e | <b>-4,39</b>  | <b>4,81E-05</b> | 3,42E-06 | <b>-1,53</b> | <b>7,71E-02</b> |
| NM_032387    | WNK4      | WNK lysine deficient protein kinase 4                                | <b>-4,35</b>  | <b>4,81E-05</b> | 3,62E-06 | <b>-3,57</b> | <b>8,26E-03</b> |
| NM_002344    | LTK       | leukocyte tyrosine kinase                                            | <b>-4,35</b>  | <b>4,81E-05</b> | 3,70E-06 | <b>-1,33</b> | <b>2,61E-01</b> |
| NM_005248    | FGR       | Gardner-Rasheed feline sarcoma viral (v-fgr) oncogene homolog        | <b>-4,33</b>  | <b>4,81E-05</b> | 3,87E-06 | <b>1,29</b>  | <b>2,61E-01</b> |
| NM_001556    | IKBKB     | inhibitor of kappa light polypeptide gene enhancer in B-cells, kinas | <b>-4,36</b>  | <b>7,24E-05</b> | 3,92E-06 | <b>-1,84</b> | <b>2,72E-02</b> |
| NM_025211    | GKAP1     | G kinase anchoring protein 1                                         | <b>-4,28</b>  | <b>7,99E-05</b> | 4,16E-06 | <b>-1,23</b> | <b>3,30E-01</b> |
| NM_001080434 | LMTK3     | lemur tyrosine kinase 3                                              | <b>-4,36</b>  | <b>7,99E-05</b> | 4,43E-06 | <b>-6,00</b> | <b>8,26E-03</b> |
| NM_182982    | GRK4      | G protein-coupled receptor kinase 4                                  | <b>-4,31</b>  | <b>7,99E-05</b> | 4,90E-06 | <b>-1,67</b> | <b>7,71E-02</b> |
| NM_001211    | BUB1B     | BUB1 budding uninhibited by benzimidazoles 1 homolog beta (yea       | <b>-4,22</b>  | <b>1,74E-04</b> | 4,96E-06 | <b>-1,49</b> | <b>7,71E-02</b> |
| NM_017572    | MKNK2     | MAP kinase interacting serine/threonine kinase 2                     | <b>-4,23</b>  | <b>1,74E-04</b> | 5,56E-06 | <b>1,00</b>  | <b>1,00E+00</b> |
| NM_004217    | AURKB     | aurora kinase B                                                      | <b>-4,19</b>  | <b>1,74E-04</b> | 6,52E-06 | <b>-1,55</b> | <b>7,71E-02</b> |
| NM_007271    | STK38     | serine/threonine kinase 38                                           | <b>-4,10</b>  | <b>1,74E-04</b> | 7,29E-06 | <b>-1,08</b> | <b>1,00E+00</b> |
| NM_004579    | MAP4K2    | mitogen-activated protein kinase kinase kinase kinase 2              | <b>-3,99</b>  | <b>1,74E-04</b> | 7,73E-06 | <b>-2,40</b> | <b>3,88E-02</b> |
| NM_001277    | CHKA      | choline kinase alpha                                                 | <b>-4,04</b>  | <b>1,74E-04</b> | 7,95E-06 | <b>-1,47</b> | <b>1,56E-01</b> |
| NM_003331    | TYK2      | tyrosine kinase 2                                                    | <b>-3,89</b>  | <b>1,74E-04</b> | 8,98E-06 | <b>1,01</b>  | <b>1,00E+00</b> |
| NM_001222    | CAMK2G    | calcium/calmodulin-dependent protein kinase (CaM kinase) II gam      | <b>-3,90</b>  | <b>1,74E-04</b> | 9,99E-06 | <b>-1,42</b> | <b>9,16E-02</b> |
| NM_005198    | CHKB      | choline kinase beta                                                  | <b>-3,83</b>  | <b>1,74E-04</b> | 1,01E-05 | <b>-1,44</b> | <b>9,16E-02</b> |
| NM_182661    | CERK      | ceramide kinase                                                      | <b>-4,20</b>  | <b>1,94E-04</b> | 1,02E-05 | <b>-2,06</b> | <b>3,88E-02</b> |
| NM_020990    | CKMT1     | creatine kinase, mitochondrial 1 (ubiquitous)                        | <b>-3,82</b>  | <b>2,64E-04</b> | 1,08E-05 | <b>-1,55</b> | <b>7,71E-02</b> |
| NM_001826    | CKS1B     | CDC28 protein kinase regulatory subunit 1B                           | <b>-3,77</b>  | <b>4,41E-04</b> | 1,17E-05 | <b>1,08</b>  | <b>1,00E+00</b> |
| NM_018571    | ALS2CR2   | amyotrophic lateral sclerosis 2 (juvenile) chromosome region, canc   | <b>-3,64</b>  | <b>4,41E-04</b> | 1,58E-05 | <b>-2,01</b> | <b>1,86E-02</b> |
| NM_001654    | ARAF      | v-raf murine sarcoma 3611 viral oncogene homolog                     | <b>-3,65</b>  | <b>4,41E-04</b> | 1,59E-05 | <b>-1,25</b> | <b>2,99E-01</b> |
| NM_014238    | KSR       | kinase suppressor of ras                                             | <b>-3,61</b>  | <b>4,41E-04</b> | 2,01E-05 | <b>-1,50</b> | <b>2,38E-01</b> |
| NM_005607    | PTK2      | PTK2 protein tyrosine kinase 2                                       | <b>-3,83</b>  | <b>4,41E-04</b> | 2,17E-05 | <b>-1,19</b> | <b>5,48E-01</b> |
| NM_000455    | STK11     | serine/threonine kinase 11 (Peutz-Jeghers syndrome)                  | <b>-3,50</b>  | <b>4,41E-04</b> | 2,19E-05 | <b>-1,11</b> | <b>1,00E+00</b> |
| NM_004073    | PLK3      | polo-like kinase 3 (Drosophila)                                      | <b>-3,48</b>  | <b>4,41E-04</b> | 2,29E-05 | <b>1,19</b>  | <b>3,97E-01</b> |
| NM_002958    | RYK       | RYK receptor-like tyrosine kinase                                    | <b>-3,51</b>  | <b>4,41E-04</b> | 2,33E-05 | <b>-1,86</b> | <b>3,88E-02</b> |
| NM_002744    | PRKCZ     | protein kinase C, zeta                                               | <b>-3,46</b>  | <b>4,41E-04</b> | 2,49E-05 | <b>-1,34</b> | <b>2,61E-01</b> |

|           |          |                                                                    |       |          |          |       |          |
|-----------|----------|--------------------------------------------------------------------|-------|----------|----------|-------|----------|
| NM_002749 | MAPK7    | mitogen-activated protein kinase 7                                 | -3,52 | 9,55E-04 | 2,50E-05 | -1,09 | 1,00E+00 |
| NM_002732 | PRKACG   | protein kinase, cAMP-dependent, catalytic, gamma                   | -3,39 | 9,55E-04 | 3,62E-05 | 2,63  | 7,71E-02 |
| NM_018842 | BAIAP2L1 | BAI1-associated protein 2-like 1                                   | -3,29 | 9,55E-04 | 3,64E-05 | -2,54 | 3,88E-02 |
| NM_002735 | PRKAR1B  | protein kinase, cAMP-dependent, regulatory, type I, beta           | -3,32 | 9,55E-04 | 3,68E-05 | -1,55 | 2,38E-01 |
| NM_002005 | FES      | feline sarcoma oncogene                                            | -3,21 | 9,55E-04 | 4,75E-05 | -1,23 | 3,41E-01 |
| NM_002612 | PDK4     | pyruvate dehydrogenase kinase, isoenzyme 4                         | -3,56 | 9,55E-04 | 4,85E-05 | -2,03 | 3,19E-02 |
| NM_004517 | ILK      | integrin-linked kinase                                             | -3,16 | 9,55E-04 | 5,18E-05 | 2,01  | 2,38E-02 |
| NM_001123 | ADK      | adenosine kinase                                                   | -3,18 | 9,55E-04 | 5,26E-05 | 1,44  | 9,16E-02 |
| NM_152835 | PDIK1L   | PDLIM1 interacting kinase 1 like                                   | -3,16 | 9,55E-04 | 5,85E-05 | 1,29  | 2,61E-01 |
| NM_006182 | DDR2     | discoidin domain receptor family, member 2                         | -3,27 | 9,55E-04 | 5,95E-05 | -1,10 | 1,00E+00 |
| NM_004705 | PRKRIR   | protein-kinase, interferon-inducible double stranded RNA depende   | -3,07 | 9,55E-04 | 6,94E-05 | -1,33 | 2,61E-01 |
| NM_004064 | CDKN1B   | cyclin-dependent kinase inhibitor 1B (p27, Kip1)                   | -3,05 | 9,55E-04 | 7,08E-05 | 1,18  | 5,48E-01 |
| NM_000292 | PHKA2    | phosphorylase kinase, alpha 2 (liver)                              | -3,40 | 9,55E-04 | 7,10E-05 | -1,35 | 2,61E-01 |
| NM_004441 | EPHB1    | EPH receptor B1                                                    | -3,05 | 9,55E-04 | 7,30E-05 | -1,26 | 2,77E-01 |
| NM_004431 | EPHA2    | EPH receptor A2                                                    | -3,05 | 9,55E-04 | 7,37E-05 | 1,19  | 1,00E+00 |
| NM_032294 | CAMKK1   | calcium/calmodulin-dependent protein kinase kinase 1, alpha        | -3,03 | 9,55E-04 | 7,82E-05 | -3,42 | 1,47E-02 |
| NM_003576 | STK24    | serine/threonine kinase 24 (STE20 homolog, yeast)                  | -3,06 | 9,55E-04 | 7,90E-05 | 1,47  | 2,61E-01 |
| NM_004842 | AKAP7    | A kinase (PRKA) anchor protein 7                                   | -3,01 | 9,55E-04 | 8,19E-05 | -1,39 | 1,17E-01 |
| NM_153273 | IHPK1    | inositol hexaphosphate kinase 1                                    | -3,00 | 9,55E-04 | 8,86E-05 | -2,03 | 2,16E-02 |
| NM_001743 | CALM2    | calmodulin 2 (phosphorylase kinase, delta)                         | -2,97 | 9,55E-04 | 9,31E-05 | 2,26  | 1,86E-02 |
| NM_005255 | GAK      | cyclin G associated kinase                                         | -2,95 | 9,55E-04 | 9,53E-05 | -1,00 | 1,00E+00 |
| NM_002645 | PIK3C2A  | phosphoinositide-3-kinase, class 2, alpha polypeptide              | -3,09 | 9,55E-04 | 9,78E-05 | -1,02 | 1,00E+00 |
| NM_001619 | ADRBK1   | adrenergic, beta, receptor kinase 1                                | -2,96 | 9,55E-04 | 1,02E-04 | -1,08 | 1,00E+00 |
| NM_005184 | CALM3    | calmodulin 3 (phosphorylase kinase, delta)                         | -3,01 | 9,55E-04 | 1,02E-04 | 2,01  | 9,16E-02 |
| NM_022344 | NJMU-R1  | protein kinase Njmu-R1                                             | -2,94 | 9,55E-04 | 1,04E-04 | -2,01 | 2,16E-02 |
| NM_004203 | PKMYT1   | protein kinase, membrane associated tyrosine/threonine 1           | -2,97 | 2,04E-03 | 1,05E-04 | 1,45  | 2,38E-01 |
| NM_006712 | FASTK    | FAST kinase                                                        | -2,88 | 2,04E-03 | 1,23E-04 | 1,19  | 1,00E+00 |
| NM_003390 | WEE1     | WEE1 homolog (S. pombe)                                            | -2,90 | 2,04E-03 | 1,25E-04 | 1,24  | 5,50E-01 |
| NM_004672 | MAP3K6   | mitogen-activated protein kinase kinase kinase 6                   | -2,89 | 2,88E-03 | 1,25E-04 | -1,21 | 3,97E-01 |
| NM_001715 | BLK      | B lymphoid tyrosine kinase                                         | 1,01  | 1,00E+00 | 5,00E-01 | 6,46  | 8,26E-03 |
| NM_002082 | GRK6     | G protein-coupled receptor kinase 6                                | 1,05  | 1,00E+00 | 4,99E-01 | 2,25  | 3,88E-02 |
| NM_174858 | AK5      | adenylate kinase 5                                                 | 1,01  | 1,00E+00 | 4,96E-01 | 1,60  | 4,87E-02 |
| NM_012407 | PRKCABP  | protein kinase C, alpha binding protein                            | -2,85 | 2,88E-03 | 1,38E-04 | 1,48  | 7,71E-02 |
| NM_001204 | BMPR2    | bone morphogenetic protein receptor, type II (serine/threonine kin | 1,01  | 1,00E+00 | 4,94E-01 | 1,93  | 3,88E-02 |
| NM_005813 | PRKD3    | protein kinase D3                                                  | -1,01 | 1,00E+00 | 4,88E-01 | 2,65  | 8,26E-03 |
| NM_005921 | MAP3K1   | mitogen-activated protein kinase kinase kinase 1                   | 1,09  | 1,00E+00 | 5,02E-01 | -1,09 | 1,00E+00 |
| NM_002649 | PIK3CG   | phosphoinositide-3-kinase, catalytic, gamma polypeptide            | -1,01 | 1,00E+00 | 4,86E-01 | 1,24  | 3,97E-01 |
| NM_173575 | STK32C   | serine/threonine kinase 32C                                        | 1,00  | 1,00E+00 | 4,81E-01 | 2,13  | 1,47E-02 |
| NM_013254 | TBK1     | TANK-binding kinase 1                                              | 1,01  | 1,00E+00 | 4,81E-01 | 3,19  | 8,26E-03 |
| NM_002110 | HCK      | hemopoietic cell kinase                                            | -1,01 | 1,00E+00 | 4,81E-01 | 1,27  | 2,77E-01 |
| NM_022128 | RBKS     | ribokinase                                                         | 1,00  | 1,00E+00 | 5,04E-01 | 1,98  | 3,19E-02 |
| XM_291141 | MAST4    | microtubule associated serine/threonine kinase family member 4     | -1,01 | 1,00E+00 | 4,74E-01 | 2,67  | 8,26E-03 |

|              |           |                                                                       |       |          |          |       |          |
|--------------|-----------|-----------------------------------------------------------------------|-------|----------|----------|-------|----------|
| NM_003177    | SYK       | spleen tyrosine kinase                                                | 1,02  | 1,00E+00 | 4,73E-01 | 1,87  | 7,71E-02 |
| NM_003607    | CDC42BPA  | CDC42 binding protein kinase alpha (DMPK-like)                        | -1,02 | 1,00E+00 | 4,72E-01 | 3,84  | 2,57E-02 |
| NM_005108    | XYLB      | xylokinase homolog (H. influenzae)                                    | -1,00 | 1,00E+00 | 4,72E-01 | 1,92  | 2,38E-02 |
| NM_181795    | PKIB      | protein kinase (cAMP-dependent, catalytic) inhibitor beta             | 1,01  | 1,00E+00 | 4,69E-01 | 2,11  | 1,47E-02 |
| NM_004734    | DCAMKL1   | doublecortin and CaM kinase-like 1                                    | -2,77 | 2,88E-03 | 1,70E-04 | 1,02  | 1,00E+00 |
| NM_002733    | PRKAG1    | protein kinase, AMP-activated, gamma 1 non-catalytic subunit          | 1,06  | 1,00E+00 | 4,62E-01 | -1,09 | 8,06E-01 |
| NM_014216    | ITPK1     | inositol 1,3,4-triphosphate 5/6 kinase                                | -1,01 | 1,00E+00 | 4,62E-01 | 1,40  | 9,16E-02 |
| NM_018343    | RIOK2     | RIO kinase 2 (yeast)                                                  | -2,85 | 2,88E-03 | 1,79E-04 | -1,14 | 8,06E-01 |
| NM_004714    | DYRK1B    | dual-specificity tyrosine-(Y)-phosphorylation regulated kinase 1B     | 1,13  | 1,00E+00 | 4,60E-01 | 4,07  | 4,87E-02 |
| NM_014370    | STK23     | serine/threonine kinase 23                                            | -1,03 | 1,00E+00 | 4,54E-01 | 1,94  | 2,16E-02 |
| NM_003010    | MAP2K4    | mitogen-activated protein kinase kinase 4                             | -1,03 | 1,00E+00 | 4,50E-01 | 2,05  | 2,38E-02 |
| NM_015133    | MAPK8IP3  | mitogen-activated protein kinase 8 interacting protein 3              | 1,03  | 1,00E+00 | 5,09E-01 | 1,71  | 3,88E-02 |
| NM_004972    | JAK2      | Janus kinase 2 (a protein tyrosine kinase)                            | -2,74 | 2,88E-03 | 1,99E-04 | 1,59  | 2,77E-01 |
| NM_004721    | MAP3K13   | mitogen-activated protein kinase kinase kinase 13                     | -2,72 | 2,88E-03 | 2,03E-04 | 1,10  | 1,00E+00 |
| NM_002756    | MAP2K3    | mitogen-activated protein kinase kinase 3                             | -2,74 | 2,88E-03 | 2,06E-04 | -1,61 | 2,38E-01 |
| NM_017719    | SNRK      | SNF-1 related kinase                                                  | -1,03 | 1,00E+00 | 4,43E-01 | 1,47  | 1,56E-01 |
| NM_006218    | PIK3CA    | phosphoinositide-3-kinase, catalytic, alpha polypeptide               | -1,02 | 1,00E+00 | 4,42E-01 | 2,12  | 2,38E-02 |
| NM_016457    | PRKD2     | protein kinase D2                                                     | -2,70 | 2,88E-03 | 2,15E-04 | 1,26  | 2,77E-01 |
| NM_033550    | TP53RK    | TP53 regulating kinase                                                | -1,01 | 1,00E+00 | 4,36E-01 | 1,43  | 1,62E-01 |
| NM_013330    | NME7      | non-metastatic cells 7, protein expressed in (nucleoside-diphosphate) | -2,70 | 2,88E-03 | 2,20E-04 | -1,95 | 2,38E-02 |
| NM_006716    | ASK       | activator of S phase kinase                                           | 1,01  | 1,00E+00 | 5,11E-01 | 2,72  | 8,26E-03 |
| NM_007194    | CHEK2     | CHK2 checkpoint homolog (S. pombe)                                    | -1,01 | 1,00E+00 | 4,34E-01 | 2,08  | 2,16E-02 |
| NM_001010844 | IRAK1BP1  | interleukin-1 receptor-associated kinase 1 binding protein 1          | -1,04 | 1,00E+00 | 4,32E-01 | 2,37  | 1,47E-02 |
| NM_005417    | SRC       | v-src sarcoma (Schmidt-Ruppin A-2) viral oncogene homolog (avian)     | -2,68 | 2,88E-03 | 2,27E-04 | 1,03  | 1,00E+00 |
| NM_020421    | ADCK1     | aarF domain containing kinase 1                                       | -2,78 | 2,88E-03 | 2,31E-04 | -1,64 | 7,71E-02 |
| NM_002748    | MAPK6     | mitogen-activated protein kinase 6                                    | -2,69 | 2,88E-03 | 2,44E-04 | -1,39 | 1,17E-01 |
| NM_016653    | ZAK       | sterile alpha motif and leucine zipper containing kinase AZK          | -1,02 | 1,00E+00 | 4,22E-01 | 1,27  | 2,99E-01 |
| NM_005884    | PAK4      | p21(CDKN1A)-activated kinase 4                                        | -2,66 | 2,88E-03 | 2,46E-04 | 1,10  | 1,00E+00 |
| NM_015071    | ARHGAP26  | Rho GTPase activating protein 26                                      | -1,05 | 1,00E+00 | 4,19E-01 | 2,61  | 8,26E-03 |
| XM_375150    | LOC400301 | similar to protein kinase CHK2 isoform b; checkpoint-like protein C   | -1,05 | 1,00E+00 | 4,17E-01 | 1,69  | 3,88E-02 |
| NM_032028    | STK22D    | serine/threonine kinase 22D (spermiogenesis associated)               | -2,72 | 2,88E-03 | 2,57E-04 | -1,32 | 2,61E-01 |
| NM_015716    | MINK1     | misshapen-like kinase 1 (zebrafish)                                   | -1,03 | 1,00E+00 | 4,14E-01 | 1,84  | 2,38E-02 |
| NM_004836    | EIF2AK3   | eukaryotic translation initiation factor 2-alpha kinase 3             | -2,64 | 2,88E-03 | 2,62E-04 | -1,17 | 5,81E-01 |
| NM_015978    | TNNI3K    | TNNI3 interacting kinase                                              | -1,04 | 1,00E+00 | 4,12E-01 | 1,45  | 7,71E-02 |
| NM_138316    | PANK1     | pantothenate kinase 1                                                 | -1,04 | 1,00E+00 | 4,12E-01 | 1,64  | 4,87E-02 |
| NM_003681    | C21orf124 | chromosome 21 open reading frame 124                                  | -2,64 | 5,35E-03 | 1,12E-01 | -7,61 | 8,26E-03 |
| NM_015375    | RIPK5     | receptor interacting protein kinase 5                                 | -1,04 | 1,00E+00 | 4,10E-01 | 1,68  | 4,31E-02 |
| NM_002497    | NEK2      | NIMA (never in mitosis gene a)-related kinase 2                       | -1,05 | 1,00E+00 | 4,10E-01 | 1,74  | 9,16E-02 |
| NM_030662    | MAP2K2    | mitogen-activated protein kinase kinase 2                             | -1,03 | 1,00E+00 | 4,06E-01 | 2,41  | 3,19E-02 |
| NM_004760    | STK17A    | serine/threonine kinase 17a (apoptosis-inducing)                      | 1,01  | 1,00E+00 | 5,16E-01 | 1,98  | 2,16E-02 |
| NM_033266    | ERN2      | endoplasmic reticulum to nucleus signalling 2                         | -1,05 | 1,00E+00 | 3,98E-01 | 1,56  | 4,87E-02 |
| NM_002747    | MAPK4     | mitogen-activated protein kinase 4                                    | -2,62 | 5,35E-03 | 2,99E-04 | 1,26  | 3,41E-01 |

|           |              |                                                                    |       |          |          |       |          |
|-----------|--------------|--------------------------------------------------------------------|-------|----------|----------|-------|----------|
| NM_004409 | DMPK         | dystrophia myotonica-protein kinase                                | -2,59 | 5,35E-03 | 3,12E-04 | -1,22 | 3,97E-01 |
| NM_145001 | STK32A       | serine/threonine kinase 32A                                        | 1,01  | 1,00E+00 | 5,19E-01 | 2,44  | 1,47E-02 |
| NM_006904 | PRKDC        | protein kinase, DNA-activated, catalytic polypeptide               | -1,01 | 1,00E+00 | 3,90E-01 | 1,48  | 2,77E-01 |
| NM_002969 | MAPK12       | mitogen-activated protein kinase 12                                | -1,02 | 1,00E+00 | 3,87E-01 | 1,11  | 1,00E+00 |
| NM_003559 | PIP5K2B      | phosphatidylinositol-4-phosphate 5-kinase, type II, beta           | -2,56 | 5,35E-03 | 3,43E-04 | 1,54  | 1,62E-01 |
| NM_178510 | ANKK1        | ankyrin repeat and kinase domain containing 1                      | -1,07 | 1,00E+00 | 3,74E-01 | 1,23  | 3,30E-01 |
| NM_000269 | NME1         | non-metastatic cells 1, protein (NM23A) expressed in               | -1,08 | 1,00E+00 | 3,74E-01 | 2,48  | 1,47E-02 |
| NM_002753 | MAPK10       | mitogen-activated protein kinase 10                                | 1,08  | 1,00E+00 | 3,74E-01 | 2,25  | 4,87E-02 |
| NM_031892 | SH3KBP1      | SH3-domain kinase binding protein 1                                | -1,06 | 1,00E+00 | 3,73E-01 | 2,33  | 1,86E-02 |
| NM_001203 | BMPR1B       | bone morphogenetic protein receptor, type IB                       | -1,02 | 1,00E+00 | 3,73E-01 | 2,79  | 1,86E-02 |
| NM_005391 | PDK3         | pyruvate dehydrogenase kinase, isoenzyme 3                         | -1,06 | 1,00E+00 | 3,72E-01 | 1,95  | 7,71E-02 |
| NM_004197 | STK19        | serine/threonine kinase 19                                         | -1,05 | 1,00E+00 | 3,71E-01 | 2,22  | 1,47E-02 |
| NM_003557 | PIP5K1A      | phosphatidylinositol-4-phosphate 5-kinase, type I, alpha           | 1,04  | 1,00E+00 | 3,70E-01 | 3,34  | 8,26E-03 |
| NM_001892 | CSNK1A1      | casein kinase 1, alpha 1                                           | -2,57 | 5,35E-03 | 3,75E-04 | -1,01 | 1,00E+00 |
| NM_003647 | DGKE         | diacylglycerol kinase, epsilon 64kDa                               | -1,06 | 1,00E+00 | 3,69E-01 | 1,85  | 2,21E-01 |
| NM_003258 | TK1          | thymidine kinase 1, soluble                                        | -1,05 | 1,00E+00 | 3,66E-01 | 1,90  | 7,71E-02 |
| NM_003488 | AKAP1        | A kinase (PRKA) anchor protein 1                                   | -2,54 | 5,35E-03 | 3,95E-04 | -1,07 | 1,00E+00 |
| NM_002736 | PRKAR2B      | protein kinase, cAMP-dependent, regulatory, type II, beta          | -2,54 | 5,35E-03 | 4,01E-04 | -1,64 | 7,71E-02 |
| NM_004759 | MAPKAPK2     | mitogen-activated protein kinase-activated protein kinase 2        | -1,08 | 1,00E+00 | 3,62E-01 | -1,27 | 2,61E-01 |
| NM_003629 | PIK3R3       | phosphoinositide-3-kinase, regulatory subunit 3 (p55, gamma)       | -1,08 | 1,00E+00 | 3,62E-01 | 2,47  | 8,26E-03 |
| NM_006549 | CAMKK2       | calcium/calmodulin-dependent protein kinase kinase 2, beta         | 1,02  | 1,00E+00 | 5,24E-01 | 1,61  | 7,71E-02 |
| NM_018291 | FLJ10986     | hypothetical protein FLJ10986                                      | -1,09 | 1,00E+00 | 3,55E-01 | 2,39  | 1,47E-02 |
| NM_014911 | AAK1         | AP2 associated kinase 1                                            | -2,51 | 5,35E-03 | 4,32E-04 | -1,49 | 7,71E-02 |
| NM_001570 | IRAK2        | interleukin-1 receptor-associated kinase 2                         | -2,49 | 5,35E-03 | 4,40E-04 | 1,33  | 2,61E-01 |
| NM_001221 | CAMK2D       | calcium/calmodulin-dependent protein kinase (CaM kinase) II delta  | -1,07 | 1,00E+00 | 3,50E-01 | 2,28  | 1,47E-02 |
| NM_181839 | PKIA         | protein kinase (cAMP-dependent, catalytic) inhibitor alpha         | -2,48 | 5,35E-03 | 4,62E-04 | 1,02  | 1,00E+00 |
| NM_032017 | MGC4796      | Ser/Thr-like kinase                                                | -2,48 | 5,35E-03 | 4,76E-04 | -2,30 | 1,86E-02 |
| NM_005433 | YES1         | v-yes-1 Yamaguchi sarcoma viral oncogene homolog 1                 | -1,07 | 1,00E+00 | 3,42E-01 | 2,39  | 2,72E-02 |
| NM_013410 | AK3          | adenylate kinase 3                                                 | -2,48 | 5,35E-03 | 4,80E-04 | 2,35  | 1,47E-02 |
| NM_002625 | PFKFB1       | 6-phosphofructo-2-kinase/fructose-2,6-biphosphatase 1              | -1,10 | 1,00E+00 | 3,39E-01 | 1,82  | 3,88E-02 |
| NM_012145 | DTYMK        | deoxythymidylate kinase (thymidylate kinase)                       | -2,44 | 5,35E-03 | 5,37E-04 | -1,00 | 1,00E+00 |
| NM_001274 | CHEK1        | CHK1 checkpoint homolog (S. pombe)                                 | -2,45 | 5,35E-03 | 5,45E-04 | 1,18  | 5,81E-01 |
| NM_052902 | STK11IP      | serine/threonine kinase 11 interacting protein                     | 1,03  | 1,00E+00 | 5,31E-01 | 2,29  | 1,47E-02 |
| NM_018584 | CaMKIINalpha | calcium/calmodulin-dependent protein kinase II                     | -2,43 | 5,35E-03 | 5,82E-04 | -1,63 | 7,71E-02 |
| NM_000061 | BTK          | Bruton agammaglobulinemia tyrosine kinase                          | -2,42 | 5,35E-03 | 6,03E-04 | 1,50  | 9,16E-02 |
| NM_006374 | STK25        | serine/threonine kinase 25 (STE20 homolog, yeast)                  | -2,41 | 5,35E-03 | 6,03E-04 | -1,75 | 3,19E-02 |
| NM_006852 | TLK2         | tousled-like kinase 2                                              | -2,41 | 5,35E-03 | 6,20E-04 | -1,05 | 1,00E+00 |
| NM_006256 | PKN2         | protein kinase N2                                                  | -1,08 | 1,00E+00 | 3,11E-01 | 2,50  | 2,32E-02 |
| NM_003942 | RPS6KA4      | ribosomal protein S6 kinase, 90kDa, polypeptide 4                  | -2,45 | 5,35E-03 | 6,40E-04 | 1,77  | 4,71E-01 |
| XM_208545 | LOC283155    | similar to bone morphogenetic protein receptor, type IA precursor; | -2,39 | 5,35E-03 | 6,48E-04 | -1,16 | 8,06E-01 |
| NM_002754 | MAPK13       | mitogen-activated protein kinase 13                                | -2,39 | 5,35E-03 | 6,48E-04 | -1,23 | 3,97E-01 |
| NM_007229 | PACSIN2      | protein kinase C and casein kinase substrate in neurons 2          | -2,39 | 5,35E-03 | 6,48E-04 | 1,40  | 9,16E-02 |

|           |          |                                                                      |       |          |          |       |          |
|-----------|----------|----------------------------------------------------------------------|-------|----------|----------|-------|----------|
| NM_017729 | EPS8L1   | EPS8-like 1                                                          | -2,38 | 5,35E-03 | 6,82E-04 | -1,02 | 1,00E+00 |
| NM_004567 | PFKFB4   | 6-phosphofructo-2-kinase/fructose-2,6-biphosphatase 4                | -1,09 | 1,00E+00 | 2,96E-01 | 2,14  | 1,47E-02 |
| NM_003600 | STK6     | serine/threonine kinase 6                                            | -2,39 | 5,35E-03 | 7,22E-04 | 1,74  | 7,71E-02 |
| NM_002651 | PIK4CB   | phosphatidylinositol 4-kinase, catalytic, beta polypeptide           | -2,38 | 5,35E-03 | 7,22E-04 | 1,51  | 2,38E-01 |
| NM_004274 | AKAP6    | A kinase (PRKA) anchor protein 6                                     | -2,36 | 5,35E-03 | 7,57E-04 | -1,44 | 9,16E-02 |
| NM_152910 | DGKH     | diacylglycerol kinase, eta                                           | -1,13 | 1,00E+00 | 2,87E-01 | 1,03  | 1,00E+00 |
| NM_005356 | LCK      | lymphocyte-specific protein tyrosine kinase                          | -2,34 | 5,35E-03 | 7,89E-04 | -1,71 | 4,31E-02 |
| NM_004440 | EPHA7    | EPH receptor A7                                                      | -2,34 | 5,35E-03 | 8,12E-04 | -1,01 | 1,00E+00 |
| NM_003948 | CDKL2    | cyclin-dependent kinase-like 2 (CDC2-related kinase)                 | 1,08  | 1,00E+00 | 5,39E-01 | 2,36  | 3,88E-02 |
| NM_001433 | ERN1     | endoplasmic reticulum to nucleus signalling 1                        | -2,32 | 5,35E-03 | 8,48E-04 | 1,09  | 1,00E+00 |
| NM_152883 | PTK7     | PTK7 protein tyrosine kinase 7                                       | -2,33 | 5,35E-03 | 8,52E-04 | 1,28  | 2,77E-01 |
| NM_004444 | EPHB4    | EPH receptor B4                                                      | -2,32 | 5,35E-03 | 8,56E-04 | 1,91  | 3,88E-02 |
| NM_004635 | MAPKAPK3 | mitogen-activated protein kinase-activated protein kinase 3          | -1,13 | 1,00E+00 | 2,77E-01 | 2,17  | 1,47E-02 |
| NM_001292 | CLK3     | CDC-like kinase 3                                                    | -2,32 | 5,35E-03 | 8,60E-04 | -1,04 | 1,00E+00 |
| NM_002020 | FLT4     | fms-related tyrosine kinase 4                                        | -2,33 | 5,35E-03 | 8,61E-04 | 1,26  | 3,97E-01 |
| NM_002759 | EIF2AK2  | eukaryotic translation initiation factor 2-alpha kinase 2            | -2,34 | 9,62E-03 | 8,61E-04 | -1,21 | 5,48E-01 |
| NM_018323 | PI4K2B   | phosphatidylinositol 4-kinase type-II beta                           | 1,03  | 1,00E+00 | 5,40E-01 | 1,22  | 3,41E-01 |
| NM_000077 | CDKN2A   | cyclin-dependent kinase inhibitor 2A (melanoma, p16, inhibits CDK    | -1,09 | 1,00E+00 | 2,73E-01 | 2,20  | 4,87E-02 |
| NM_023018 | FLJ13052 | NAD kinase                                                           | -1,14 | 1,00E+00 | 2,73E-01 | 1,27  | 2,77E-01 |
| NM_032844 | MASTL    | microtubule associated serine/threonine kinase-like                  | -1,15 | 1,00E+00 | 2,72E-01 | 1,14  | 1,00E+00 |
| NM_003682 | MADD     | MAP-kinase activating death domain                                   | -1,12 | 1,00E+00 | 2,72E-01 | 2,48  | 3,88E-02 |
| NM_014994 | MAPKBP1  | mouse mitogen-activated protein kinase binding protein 1-like        | -2,30 | 9,62E-03 | 9,25E-04 | 1,25  | 2,77E-01 |
| NM_006285 | TESK1    | testis-specific kinase 1                                             | -2,31 | 9,62E-03 | 9,41E-04 | 2,09  | 4,31E-02 |
| NM_012424 | RPS6KC1  | ribosomal protein S6 kinase, 52kDa, polypeptide 1                    | -1,15 | 1,00E+00 | 2,65E-01 | 1,81  | 3,19E-02 |
| NM_001396 | DYRK1A   | dual-specificity tyrosine-(Y)-phosphorylation regulated kinase 1A    | -1,10 | 1,00E+00 | 2,64E-01 | -1,04 | 1,00E+00 |
| NM_000476 | AK1      | adenylate kinase 1                                                   | 1,09  | 1,00E+00 | 2,61E-01 | -1,65 | 9,16E-02 |
| NM_001315 | MAPK14   | mitogen-activated protein kinase 14                                  | -2,28 | 9,62E-03 | 1,03E-03 | 1,05  | 1,00E+00 |
| NM_052947 | ALPK2    | alpha-kinase 2                                                       | -1,16 | 1,00E+00 | 2,55E-01 | 3,73  | 8,26E-03 |
| NM_032037 | SSTK     | serine/threonine protein kinase SSTK                                 | -2,27 | 9,62E-03 | 1,07E-03 | -2,89 | 2,02E-02 |
| NM_005627 | SGK      | serum/glucocorticoid regulated kinase                                | -1,13 | 1,00E+00 | 2,52E-01 | 3,09  | 3,88E-02 |
| NM_017900 | AKIP     | aurora-A kinase interacting protein                                  | -2,26 | 9,62E-03 | 1,10E-03 | 1,22  | 3,41E-01 |
| NM_014840 | ARK5     | AMP-activated protein kinase family member 5                         | -2,26 | 9,62E-03 | 1,10E-03 | -1,02 | 1,00E+00 |
| NM_001381 | DOK1     | docking protein 1, 62kDa (downstream of tyrosine kinase 1)           | -1,17 | 1,00E+00 | 2,47E-01 | -1,13 | 8,06E-01 |
| NM_002822 | PTK9     | PTK9 protein tyrosine kinase 9                                       | -1,11 | 1,00E+00 | 2,46E-01 | 2,24  | 7,71E-02 |
| NM_005990 | STK10    | serine/threonine kinase 10                                           | -2,25 | 9,62E-03 | 1,17E-03 | 1,03  | 1,00E+00 |
| NM_015016 | MAST3    | microtubule associated serine/threonine kinase 3                     | -1,16 | 1,00E+00 | 2,44E-01 | 1,55  | 7,71E-02 |
| NM_006888 | CALM1    | calmodulin 1 (phosphorylase kinase, delta)                           | -2,24 | 9,62E-03 | 1,21E-03 | -1,21 | 3,97E-01 |
| NM_000293 | PHKB     | phosphorylase kinase, beta                                           | -1,17 | 1,00E+00 | 2,40E-01 | 2,07  | 4,87E-02 |
| NM_000431 | MVK      | mevalonate kinase (mevalonic aciduria)                               | -2,24 | 9,62E-03 | 1,23E-03 | -1,28 | 2,99E-01 |
| NM_002512 | NME2     | non-metastatic cells 2, protein (NM23B) expressed in                 | -2,24 | 9,62E-03 | 1,24E-03 | -1,14 | 8,06E-01 |
| NM_006219 | PIK3CB   | phosphoinositide-3-kinase, catalytic, beta polypeptide               | -2,23 | 9,62E-03 | 1,25E-03 | 1,11  | 1,00E+00 |
| NM_002019 | FLT1     | fms-related tyrosine kinase 1 (vascular endothelial growth factor/va | -1,17 | 1,00E+00 | 2,37E-01 | 1,17  | 8,06E-01 |

|           |          |                                                                          |       |          |          |       |          |
|-----------|----------|--------------------------------------------------------------------------|-------|----------|----------|-------|----------|
| NM_006282 | STK4     | serine/threonine kinase 4                                                | -2,23 | 9,62E-03 | 1,27E-03 | 1,37  | 2,77E-01 |
| NM_003328 | TXK      | TXK tyrosine kinase                                                      | -2,22 | 9,62E-03 | 1,29E-03 | 1,60  | 7,71E-02 |
| NM_004712 | HGS      | hepatocyte growth factor-regulated tyrosine kinase substrate             | -2,08 | 1,20E-02 | 1,31E-03 | 2,50  | 2,61E-01 |
| NM_002752 | MAPK9    | mitogen-activated protein kinase 9                                       | -1,18 | 1,00E+00 | 2,32E-01 | 1,14  | 1,00E+00 |
| NM_152671 | PIP5K3   | phosphatidylinositol-3-phosphate/phosphatidylinositol 5-kinase, tyrosine | -1,18 | 6,77E-01 | 2,31E-01 | 1,84  | 2,38E-02 |
| NM_016123 | IRAK4    | interleukin-1 receptor-associated kinase 4                               | -1,18 | 6,77E-01 | 2,31E-01 | 1,40  | 9,16E-02 |
| NM_004071 | CLK1     | CDC-like kinase 1                                                        | -1,18 | 6,77E-01 | 2,30E-01 | 2,29  | 1,86E-02 |
| NM_002758 | MAP2K6   | mitogen-activated protein kinase kinase 6                                | -2,21 | 1,20E-02 | 1,39E-03 | 1,35  | 2,38E-01 |
| NM_014371 | AKAP8L   | A kinase (PRKA) anchor protein 8-like                                    | -1,18 | 6,77E-01 | 2,27E-01 | 1,34  | 2,61E-01 |
| NM_017771 | PXK      | PX domain containing serine/threonine kinase                             | -1,18 | 6,77E-01 | 2,27E-01 | 1,78  | 7,71E-02 |
| NM_005160 | ADRBK2   | adrenergic, beta, receptor kinase 2                                      | 1,04  | 1,00E+00 | 5,49E-01 | 1,73  | 3,88E-02 |
| NM_020526 | EPHA8    | EPH receptor A8                                                          | -2,20 | 1,20E-02 | 1,42E-03 | -1,04 | 1,00E+00 |
| NM_006738 | AKAP13   | A kinase (PRKA) anchor protein 13                                        | -1,16 | 6,77E-01 | 2,25E-01 | 1,67  | 3,88E-02 |
| NM_013233 | STK39    | serine threonine kinase 39 (STE20/SPS1 homolog, yeast)                   | -1,19 | 6,77E-01 | 2,22E-01 | 1,80  | 3,19E-02 |
| NM_017525 | CDC42BPG | CDC42 binding protein kinase gamma (DMPK-like)                           | -2,19 | 1,20E-02 | 1,49E-03 | -2,07 | 4,87E-02 |
| NM_005372 | MOS      | v-mos Moloney murine sarcoma viral oncogene homolog                      | -1,13 | 6,77E-01 | 2,20E-01 | 1,31  | 2,61E-01 |
| NM_001799 | CDK7     | cyclin-dependent kinase 7 (MO15 homolog, Xenopus laevis, cdk-a)          | -1,15 | 6,77E-01 | 2,13E-01 | 1,89  | 4,87E-02 |
| NM_020168 | PAK6     | p21(CDKN1A)-activated kinase 6                                           | -2,17 | 1,20E-02 | 1,64E-03 | -1,17 | 5,50E-01 |
| NM_005009 | NME4     | non-metastatic cells 4, protein expressed in                             | -2,17 | 1,20E-02 | 1,64E-03 | 1,21  | 5,81E-01 |
| NM_053006 | STK22B   | serine/threonine kinase 22B (spermiogenesis associated)                  | -1,20 | 6,77E-01 | 2,12E-01 | 1,62  | 4,31E-02 |
| NM_003188 | MAP3K7   | mitogen-activated protein kinase kinase kinase 7                         | -1,19 | 6,77E-01 | 2,11E-01 | 2,53  | 2,02E-02 |
| NM_018650 | MARK1    | MAP/microtubule affinity-regulating kinase 1                             | -2,16 | 1,20E-02 | 1,66E-03 | 1,64  | 4,31E-02 |
| NM_002646 | PIK3C2B  | phosphoinositide-3-kinase, class 2, beta polypeptide                     | -1,19 | 6,77E-01 | 2,09E-01 | 1,34  | 2,77E-01 |
| NM_002626 | PFKL     | phosphofructokinase, liver                                               | -2,14 | 1,20E-02 | 1,75E-03 | -1,46 | 2,61E-01 |
| NM_017886 | ULK4     | unc-51-like kinase 4 (C. elegans)                                        | -1,19 | 6,77E-01 | 2,05E-01 | 1,56  | 9,16E-02 |
| NM_001262 | CDKN2C   | cyclin-dependent kinase inhibitor 2C (p18, inhibits CDK4)                | -2,15 | 1,20E-02 | 1,77E-03 | 1,94  | 2,16E-02 |
| NM_003242 | TGFBR2   | transforming growth factor, beta receptor II (70/80kDa)                  | -1,21 | 6,77E-01 | 2,03E-01 | 1,60  | 4,87E-02 |
| NM_001954 | DDR1     | discoidin domain receptor family, member 1                               | -1,20 | 6,77E-01 | 2,01E-01 | 1,95  | 2,72E-02 |
| NM_013302 | EEF2K    | eukaryotic elongation factor-2 kinase                                    | -2,14 | 1,20E-02 | 1,85E-03 | 1,20  | 3,97E-01 |
| NM_025194 | ITPKC    | inositol 1,4,5-trisphosphate 3-kinase C                                  | -2,13 | 1,20E-02 | 1,87E-03 | -2,10 | 9,16E-02 |
| NM_005163 | AKT1     | v-akt murine thymoma viral oncogene homolog 1                            | -2,13 | 1,20E-02 | 1,89E-03 | -1,30 | 2,77E-01 |
| NM_000189 | HK2      | hexokinase 2                                                             | -2,13 | 1,20E-02 | 1,89E-03 | -1,23 | 2,99E-01 |
| NM_002730 | PRKACA   | protein kinase, cAMP-dependent, catalytic, alpha                         | -2,13 | 1,20E-02 | 1,89E-03 | 1,51  | 9,16E-02 |
| NM_001319 | CSNK1G2  | casein kinase 1, gamma 2                                                 | -1,21 | 6,77E-01 | 1,97E-01 | 3,45  | 8,26E-03 |
| NM_173515 | MAGI1    | membrane associated guanylate kinase interacting protein-like 1          | -2,12 | 1,20E-02 | 1,96E-03 | 3,44  | 8,26E-03 |
| NM_006648 | WNK2     | WNK lysine deficient protein kinase 2                                    | -1,22 | 6,00E-01 | 1,95E-01 | -1,40 | 1,62E-01 |
| NM_005922 | MAP3K4   | mitogen-activated protein kinase kinase kinase 4                         | -2,12 | 1,20E-02 | 1,97E-03 | -1,00 | 1,00E+00 |
| NM_015981 | CAMK2A   | calcium/calmodulin-dependent protein kinase (CaM kinase) II alpha        | -1,20 | 6,00E-01 | 1,95E-01 | 1,96  | 2,02E-02 |
| NM_030952 | SNARK    | likely ortholog of rat SNF1/AMP-activated protein kinase                 | -1,21 | 6,00E-01 | 1,95E-01 | -1,69 | 4,87E-02 |
| NM_001346 | DGKG     | diacylglycerol kinase, gamma 90kDa                                       | -2,12 | 1,20E-02 | 1,98E-03 | -1,13 | 8,06E-01 |
| NM_002627 | PFKP     | phosphofructokinase, platelet                                            | -2,12 | 1,20E-02 | 2,00E-03 | 1,13  | 8,06E-01 |
| NM_001258 | CDK3     | cyclin-dependent kinase 3                                                | -2,12 | 1,58E-02 | 2,03E-03 | 1,69  | 3,88E-02 |

|           |           |                                                                      |       |          |          |       |          |
|-----------|-----------|----------------------------------------------------------------------|-------|----------|----------|-------|----------|
| NM_002529 | NTRK1     | neurotrophic tyrosine kinase, receptor, type 1                       | -1,20 | 6,00E-01 | 1,92E-01 | 1,60  | 7,71E-02 |
| NM_005858 | AKAP8     | A kinase (PRKA) anchor protein 8                                     | -1,20 | 6,00E-01 | 1,89E-01 | 2,97  | 8,26E-03 |
| NM_021733 | TSKS      | testis-specific kinase substrate                                     | -1,21 | 6,00E-01 | 1,89E-01 | 3,74  | 8,26E-03 |
| NM_002745 | MAPK1     | mitogen-activated protein kinase 1                                   | -2,10 | 1,58E-02 | 2,16E-03 | -1,23 | 3,41E-01 |
| NM_005012 | ROR1      | receptor tyrosine kinase-like orphan receptor 1                      | -2,10 | 1,58E-02 | 2,20E-03 | 2,16  | 4,87E-02 |
| NM_003804 | RIPK1     | receptor (TNFRSF)-interacting serine-threonine kinase 1              | -1,21 | 6,00E-01 | 1,85E-01 | 1,28  | 2,61E-01 |
| NM_001626 | AKT2      | v-akt murine thymoma viral oncogene homolog 2                        | -2,10 | 1,58E-02 | 2,21E-03 | 1,88  | 3,88E-02 |
| NM_003565 | ULK1      | unc-51-like kinase 1 (C. elegans)                                    | -1,21 | 6,00E-01 | 1,83E-01 | 1,96  | 2,38E-02 |
| NM_002637 | PHKA1     | phosphorylase kinase, alpha 1 (muscle)                               | -2,07 | 1,58E-02 | 2,25E-03 | -1,02 | 1,00E+00 |
| NM_001744 | CAMK4     | calcium/calmodulin-dependent protein kinase IV                       | -1,23 | 6,00E-01 | 1,83E-01 | 1,33  | 2,99E-01 |
| NM_002739 | PRKCG     | protein kinase C, gamma                                              | -2,08 | 1,58E-02 | 2,36E-03 | -1,11 | 1,00E+00 |
| AB037838  | IBTK      | inhibitor of Bruton agammaglobulinemia tyrosine kinase               | -1,20 | 6,00E-01 | 1,77E-01 | 1,96  | 2,38E-02 |
| NM_020397 | CAMK1D    | calcium/calmodulin-dependent protein kinase ID                       | -2,08 | 1,58E-02 | 2,43E-03 | -1,73 | 3,88E-02 |
| NM_007199 | IRAK3     | interleukin-1 receptor-associated kinase 3                           | -2,07 | 1,58E-02 | 2,45E-03 | 1,06  | 1,00E+00 |
| NM_001929 | DGUOK     | deoxyguanosine kinase                                                | -1,24 | 5,33E-01 | 1,75E-01 | 2,77  | 8,26E-03 |
| NM_003558 | PIP5K1B   | phosphatidylinositol-4-phosphate 5-kinase, type I, beta              | -1,18 | 6,00E-01 | 1,75E-01 | 2,16  | 3,19E-02 |
| NM_014365 | HSPB8     | heat shock 22kDa protein 8                                           | -1,24 | 5,33E-01 | 1,74E-01 | 1,84  | 3,88E-02 |
| NM_022731 | NUCKS     | nuclear ubiquitous casein kinase and cyclin-dependent kinase sub     | -1,24 | 5,33E-01 | 1,74E-01 | 1,95  | 3,19E-02 |
| NM_002648 | PIM1      | pim-1 oncogene                                                       | -2,05 | 1,58E-02 | 2,51E-03 | -1,21 | 3,97E-01 |
| NM_004834 | MAP4K4    | mitogen-activated protein kinase kinase kinase kinase 4              | -1,24 | 5,33E-01 | 1,73E-01 | 1,68  | 1,17E-01 |
| NM_002647 | PIK3C3    | phosphoinositide-3-kinase, class 3                                   | -1,24 | 5,33E-01 | 1,72E-01 | 1,11  | 1,00E+00 |
| NM_002610 | PDK1      | pyruvate dehydrogenase kinase, isoenzyme 1                           | -1,24 | 5,33E-01 | 1,71E-01 | 1,33  | 2,38E-01 |
| NM_001345 | DGKA      | diacylglycerol kinase, alpha 80kDa                                   | -1,24 | 5,33E-01 | 1,71E-01 | 1,40  | 3,41E-01 |
| NM_001348 | DAPK3     | death-associated protein kinase 3                                    | -2,06 | 1,58E-02 | 2,61E-03 | 1,38  | 3,41E-01 |
| NM_003618 | MAP4K3    | mitogen-activated protein kinase kinase kinase kinase 3              | -1,17 | 5,33E-01 | 1,70E-01 | 2,22  | 3,88E-02 |
| NM_032435 | KIAA1804  | mixed lineage kinase 4                                               | -2,06 | 1,58E-02 | 2,64E-03 | -1,11 | 1,00E+00 |
| NM_000215 | JAK3      | Janus kinase 3 (a protein tyrosine kinase, leukocyte)                | -1,22 | 5,33E-01 | 1,69E-01 | 2,51  | 1,47E-02 |
| NM_004383 | CSK       | c-src tyrosine kinase                                                | -2,06 | 1,58E-02 | 2,65E-03 | 3,19  | 8,26E-03 |
| NM_002577 | PAK2      | p21 (CDKN1A)-activated kinase 2                                      | -1,24 | 5,33E-01 | 1,69E-01 | 2,29  | 3,19E-02 |
| NM_003831 | RIOK3     | RIO kinase 3 (yeast)                                                 | -1,20 | 5,33E-01 | 1,69E-01 | 1,76  | 2,38E-01 |
| NM_020791 | TAOK1     | TAO kinase 1                                                         | -2,05 | 1,58E-02 | 2,70E-03 | -1,12 | 1,00E+00 |
| NM_019884 | GSK3A     | glycogen synthase kinase 3 alpha                                     | -1,24 | 5,33E-01 | 1,65E-01 | 2,72  | 2,38E-02 |
| NM_032538 | TTBK1     | tau tubulin kinase 1                                                 | -2,04 | 1,58E-02 | 2,80E-03 | -2,06 | 2,32E-02 |
| NM_001184 | ATR       | ataxia telangiectasia and Rad3 related                               | -2,04 | 1,58E-02 | 2,81E-03 | 1,84  | 3,19E-02 |
| NM_004443 | EPHB3     | EPH receptor B3                                                      | 1,05  | 1,00E+00 | 5,61E-01 | 2,37  | 3,88E-02 |
| NM_003668 | MAPKAPK5  | mitogen-activated protein kinase-activated protein kinase 5          | -2,02 | 1,58E-02 | 2,86E-03 | 1,34  | 3,97E-01 |
| NM_152696 | HIPK1     | homeodomain interacting protein kinase 1                             | -1,25 | 5,33E-01 | 1,62E-01 | 2,15  | 1,47E-02 |
| NM_020126 | SPHK2     | sphingosine kinase 2                                                 | -2,04 | 1,87E-02 | 2,88E-03 | -3,66 | 8,26E-03 |
| NM_006212 | PFKFB2    | 6-phosphofructo-2-kinase/fructose-2,6-biphosphatase 2                | -1,25 | 5,33E-01 | 1,62E-01 | 1,03  | 1,00E+00 |
| NM_003639 | IKBKG     | inhibitor of kappa light polypeptide gene enhancer in B-cells, kinas | -1,23 | 5,33E-01 | 1,61E-01 | 1,55  | 2,21E-01 |
| NM_033118 | MYLK2     | myosin light chain kinase 2, skeletal muscle                         | -1,23 | 5,33E-01 | 1,61E-01 | -1,04 | 8,06E-01 |
| NM_015093 | MAP3K7IP2 | mitogen-activated protein kinase kinase kinase 7 interacting protei  | -2,03 | 1,87E-02 | 2,96E-03 | 1,47  | 7,71E-02 |



|           |          |                                                                   |       |          |          |       |          |
|-----------|----------|-------------------------------------------------------------------|-------|----------|----------|-------|----------|
| NM_025144 | ALPK1    | alpha-kinase 1                                                    | -2,02 | 1,87E-02 | 3,09E-03 | 1,25  | 2,77E-01 |
| NM_002755 | MAP2K1   | mitogen-activated protein kinase kinase 1                         | -2,02 | 1,87E-02 | 3,14E-03 | 1,24  | 2,99E-01 |
| NM_133494 | NEK7     | NIMA (never in mitosis gene a)-related kinase 7                   | -1,27 | 5,33E-01 | 1,53E-01 | 1,48  | 9,16E-02 |
| NM_003885 | CDK5R1   | cyclin-dependent kinase 5, regulatory subunit 1 (p35)             | -2,01 | 1,87E-02 | 3,22E-03 | 1,06  | 1,00E+00 |
| NM_016542 | MST4     | Mst3 and SOK1-related kinase                                      | -2,01 | 1,87E-02 | 3,25E-03 | -1,05 | 1,00E+00 |
| NM_006622 | PLK2     | polo-like kinase 2 (Drosophila)                                   | -2,00 | 1,87E-02 | 3,30E-03 | 1,44  | 9,16E-02 |
| NM_012224 | NEK1     | NIMA (never in mitosis gene a)-related kinase 1                   | -1,99 | 2,45E-02 | 3,32E-03 | 1,34  | 2,38E-01 |
| NM_024779 | PIP5K2C  | phosphatidylinositol-4-phosphate 5-kinase, type II, gamma         | -1,27 | 5,33E-01 | 1,50E-01 | 1,38  | 2,61E-01 |
| NM_001079 | ZAP70    | zeta-chain (TCR) associated protein kinase 70kDa                  | -1,22 | 5,33E-01 | 1,50E-01 | 1,75  | 3,88E-02 |
| NM_002596 | PCTK3    | PCTAIRE protein kinase 3                                          | -1,13 | 5,33E-01 | 1,49E-01 | 1,43  | 1,00E+00 |
| NM_007181 | MAP4K1   | mitogen-activated protein kinase kinase kinase kinase 1           | -1,27 | 5,33E-01 | 1,47E-01 | -1,00 | 1,00E+00 |
| NM_002740 | PRKCI    | protein kinase C, iota                                            | -1,97 | 2,45E-02 | 3,55E-03 | -1,06 | 1,00E+00 |
| NM_002044 | GALK2    | galactokinase 2                                                   | -1,24 | 5,33E-01 | 1,45E-01 | 1,48  | 2,61E-01 |
| NM_002611 | PDK2     | pyruvate dehydrogenase kinase, isoenzyme 2                        | -1,98 | 2,45E-02 | 3,63E-03 | 1,10  | 1,00E+00 |
| NM_145185 | MAP2K7   | mitogen-activated protein kinase kinase 7                         | -1,98 | 2,45E-02 | 3,64E-03 | 1,17  | 5,50E-01 |
| NM_033214 | GK2      | glycerol kinase 2                                                 | -1,98 | 3,38E-02 | 3,65E-03 | 1,66  | 2,77E-01 |
| NM_006422 | AKAP3    | A kinase (PRKA) anchor protein 3                                  | 1,06  | 1,00E+00 | 5,65E-01 | 2,40  | 1,47E-02 |
| NM_014030 | GIT1     | G protein-coupled receptor kinase interactor 1                    | -1,27 | 5,33E-01 | 1,43E-01 | 2,32  | 1,47E-02 |
| NM_006255 | PRKCH    | protein kinase C, eta                                             | -1,27 | 5,33E-01 | 1,41E-01 | 1,67  | 3,88E-02 |
| NM_016291 | IHPK2    | inositol hexaphosphate kinase 2                                   | -1,27 | 5,33E-01 | 1,39E-01 | 1,58  | 7,71E-02 |
| NM_005965 | MYLK     | myosin, light polypeptide kinase                                  | -1,97 | 3,38E-02 | 3,92E-03 | 1,97  | 4,87E-02 |
| NM_016308 | UMP-CMPK | UMP-CMP kinase                                                    | -1,28 | 5,33E-01 | 1,36E-01 | 1,81  | 3,88E-02 |
| NM_017449 | EPHB2    | EPH receptor B2                                                   | -1,28 | 5,33E-01 | 1,36E-01 | 1,99  | 3,88E-02 |
| NM_004560 | ROR2     | receptor tyrosine kinase-like orphan receptor 2                   | -1,91 | 3,38E-02 | 4,01E-03 | -1,26 | 3,41E-01 |
| NM_002350 | LYN      | v-src-1 Yamaguchi sarcoma viral related oncogene homolog          | -1,94 | 3,38E-02 | 4,02E-03 | 2,41  | 1,47E-02 |
| NM_004857 | AKAP5    | A kinase (PRKA) anchor protein 5                                  | -1,29 | 5,33E-01 | 1,34E-01 | 1,36  | 2,61E-01 |
| NM_003332 | TYROBP   | TYRO protein tyrosine kinase binding protein                      | -1,26 | 5,33E-01 | 1,33E-01 | 1,58  | 9,16E-02 |
| NM_152619 | DCAMKL2  | doublecortin and CaM kinase-like 2                                | -1,28 | 5,33E-01 | 1,33E-01 | 2,11  | 1,47E-02 |
| NM_003952 | RPS6KB2  | ribosomal protein S6 kinase, 70kDa, polypeptide 2                 | -1,27 | 5,33E-01 | 1,33E-01 | 1,97  | 2,38E-02 |
| NM_004850 | ROCK2    | Rho-associated, coiled-coil containing protein kinase 2           | -1,95 | 3,38E-02 | 4,37E-03 | 1,56  | 4,87E-02 |
| NM_005158 | ABL2     | v-abl Abelson murine leukemia viral oncogene homolog 2 (arg, Abi) | -1,95 | 3,38E-02 | 4,38E-03 | 1,21  | 3,97E-01 |
| NM_006176 | NRGN     | neurogranin (protein kinase C substrate, RC3)                     | -1,91 | 3,38E-02 | 4,42E-03 | -1,40 | 2,77E-01 |
| NM_014720 | SLK      | STE20-like kinase (yeast)                                         | -1,94 | 3,38E-02 | 4,51E-03 | -1,07 | 1,00E+00 |
| NM_054113 | CIB3     | calcium and integrin binding family member 3                      | 1,04  | 1,00E+00 | 5,69E-01 | 1,68  | 3,88E-02 |
| NM_001896 | CSNK2A2  | casein kinase 2, alpha prime polypeptide                          | -1,24 | 5,33E-01 | 1,22E-01 | 1,78  | 2,61E-01 |
| NM_014586 | HUNK     | hormonally upregulated Neu-associated kinase                      | -1,92 | 3,38E-02 | 4,84E-03 | 1,50  | 7,71E-02 |
| NM_033141 | MAP3K9   | mitogen-activated protein kinase kinase kinase 9                  | -1,28 | 5,33E-01 | 1,19E-01 | 2,42  | 1,47E-02 |
| NM_000222 | KIT      | v-kit Hardy-Zuckerman 4 feline sarcoma viral oncogene homolog     | -1,31 | 5,33E-01 | 1,19E-01 | 1,45  | 2,99E-01 |
| NM_006213 | PHKG1    | phosphorylase kinase, gamma 1 (muscle)                            | -1,89 | 3,38E-02 | 5,47E-03 | -1,28 | 2,99E-01 |
| NM_031417 | MARK4    | MAP/microtubule affinity-regulating kinase 4                      | -1,89 | 3,38E-02 | 5,47E-03 | -1,10 | 1,00E+00 |
| NM_005975 | PTK6     | PTK6 protein tyrosine kinase 6                                    | -1,89 | 3,38E-02 | 5,52E-03 | -1,35 | 2,61E-01 |
| NM_024800 | NEK11    | NIMA (never in mitosis gene a)- related kinase 11                 | -1,90 | 3,38E-02 | 5,57E-03 | -1,43 | 1,62E-01 |

|           |          |                                                                      |       |          |          |       |          |
|-----------|----------|----------------------------------------------------------------------|-------|----------|----------|-------|----------|
| NM_015112 | MAST2    | microtubule associated serine/threonine kinase 2                     | -1,90 | 3,38E-02 | 5,58E-03 | 1,43  | 1,56E-01 |
| NM_003681 | PDXK     | pyridoxal (pyridoxine, vitamin B6) kinase                            | -1,24 | 5,33E-01 | 2,70E-04 | 1,98  | 9,16E-02 |
| NM_015518 | ULK3     | unc-51-like kinase 3 (C. elegans)                                    | -1,32 | 4,11E-01 | 1,12E-01 | 1,67  | 3,88E-02 |
| AB014541  | AATK     | apoptosis-associated tyrosine kinase                                 | -1,29 | 4,11E-01 | 1,11E-01 | 1,85  | 2,38E-01 |
| NM_005157 | ABL1     | v-abl Abelson murine leukemia viral oncogene homolog 1               | -1,88 | 3,38E-02 | 5,68E-03 | 1,64  | 3,41E-01 |
| NM_002595 | PCTK2    | PCTAIRE protein kinase 2                                             | -1,27 | 4,11E-01 | 1,11E-01 | 2,80  | 1,86E-02 |
| NM_015690 | STK36    | serine/threonine kinase 36 (fused homolog, Drosophila)               | -1,33 | 4,11E-01 | 1,11E-01 | 1,56  | 4,87E-02 |
| NM_013355 | PKN3     | protein kinase N3                                                    | -1,89 | 3,38E-02 | 5,75E-03 | 1,07  | 1,00E+00 |
| NM_014264 | PLK4     | polo-like kinase 4 (Drosophila)                                      | -1,89 | 3,38E-02 | 5,77E-03 | -1,37 | 2,38E-01 |
| NM_001827 | CKS2     | CDC28 protein kinase regulatory subunit 2                            | -1,29 | 4,11E-01 | 1,09E-01 | 3,59  | 1,47E-02 |
| NM_000459 | TEK      | TEK tyrosine kinase, endothelial (venous malformations, multiple c   | -1,86 | 3,38E-02 | 5,90E-03 | 1,68  | 7,71E-02 |
| NM_152327 | AK7      | adenylate kinase 7                                                   | -1,32 | 4,11E-01 | 1,08E-01 | 1,86  | 2,38E-02 |
| NM_001893 | CSNK1D   | casein kinase 1, delta                                               | -1,29 | 4,11E-01 | 1,08E-01 | 1,15  | 1,00E+00 |
| NM_003684 | MKNK1    | MAP kinase interacting serine/threonine kinase 1                     | -1,87 | 3,38E-02 | 6,04E-03 | 1,95  | 3,88E-02 |
| NM_003648 | DGKD     | diacylglycerol kinase, delta 130kDa                                  | -1,29 | 4,11E-01 | 1,07E-01 | 1,19  | 1,00E+00 |
| NM_016231 | NLK      | nemo like kinase                                                     | -1,88 | 3,38E-02 | 6,09E-03 | 1,62  | 3,88E-02 |
| NM_005400 | PRKCE    | protein kinase C, epsilon                                            | -1,33 | 4,11E-01 | 1,06E-01 | 1,45  | 3,97E-01 |
| NM_003936 | CDK5R2   | cyclin-dependent kinase 5, regulatory subunit 2 (p39)                | -1,78 | 3,38E-02 | 6,36E-03 | 2,30  | 1,17E-01 |
| NM_006180 | NTRK2    | neurotrophic tyrosine kinase, receptor, type 2                       | -1,65 | 3,38E-02 | 6,37E-03 | -2,00 | 1,56E-01 |
| NM_005232 | EPHA1    | EPH receptor A1                                                      | -1,86 | 3,38E-02 | 6,45E-03 | 1,55  | 1,00E+00 |
| NM_152776 | MGC40579 | hypothetical protein MGC40579                                        | -1,86 | 3,38E-02 | 6,55E-03 | 1,22  | 3,30E-01 |
| NM_000167 | GK       | glycerol kinase                                                      | -1,86 | 3,38E-02 | 6,59E-03 | 1,31  | 3,41E-01 |
| NM_018638 | ETNK1    | ethanolamine kinase 1                                                | -1,86 | 3,38E-02 | 6,59E-03 | 2,17  | 3,19E-02 |
| NM_024619 | FN3KRP   | fructosamine-3-kinase-related protein                                | -1,34 | 4,11E-01 | 1,01E-01 | 1,60  | 4,87E-02 |
| NM_001699 | AXL      | AXL receptor tyrosine kinase                                         | -1,24 | 4,11E-01 | 1,01E-01 | 3,61  | 8,26E-03 |
| NM_006201 | PCTK1    | PCTAIRE protein kinase 1                                             | -1,86 | 3,38E-02 | 6,74E-03 | 1,49  | 2,61E-01 |
| NM_003318 | TTK      | TTK protein kinase                                                   | -1,79 | 3,38E-02 | 6,89E-03 | 1,48  | 2,38E-01 |
| NM_000154 | GALK1    | galactokinase 1                                                      | -1,35 | 4,11E-01 | 9,81E-02 | 1,59  | 4,87E-02 |
| NM_003640 | IKBKAP   | inhibitor of kappa light polypeptide gene enhancer in B-cells, kinas | -1,31 | 4,11E-01 | 9,80E-02 | 1,71  | 3,88E-02 |
| NM_015076 | CDC2L6   | cell division cycle 2-like 6 (CDK8-like)                             | -1,85 | 3,38E-02 | 6,97E-03 | 1,67  | 3,88E-02 |
| NM_005044 | PRKX     | protein kinase, X-linked                                             | -1,83 | 3,38E-02 | 7,00E-03 | 1,27  | 2,61E-01 |
| NM_024960 | PANK2    | pantothenate kinase 2 (Hallervorden-Spatz syndrome)                  | -1,85 | 3,96E-02 | 7,05E-03 | -1,36 | 2,61E-01 |
| NM_004384 | CSNK1G3  | casein kinase 1, gamma 3                                             | -1,83 | 4,78E-02 | 7,18E-03 | 1,42  | 9,16E-02 |
| NM_003161 | RPS6KB1  | ribosomal protein S6 kinase, 70kDa, polypeptide 1                    | -1,28 | 4,11E-01 | 9,48E-02 | 1,85  | 2,38E-02 |
| NM_000141 | FGFR2    | fibroblast growth factor receptor 2 (bacteria-expressed kinase, ker  | -1,34 | 4,11E-01 | 9,38E-02 | 1,79  | 7,71E-02 |
| NM_002772 | PRSS7    | protease, serine, 7 (enterokinase)                                   | -1,35 | 4,11E-01 | 9,36E-02 | 1,91  | 2,38E-02 |
| BX640919  | EIF2AK4  | eukaryotic translation initiation factor 2 alpha kinase 4            | -1,35 | 4,11E-01 | 9,22E-02 | 1,40  | 2,21E-01 |
| NM_003957 | STK29    | serine/threonine kinase 29                                           | -1,30 | 4,11E-01 | 9,16E-02 | 1,76  | 2,38E-01 |
| NM_178170 | NEK8     | NIMA (never in mitosis gene a)- related kinase 8                     | 1,04  | 1,00E+00 | 5,76E-01 | 1,30  | 2,61E-01 |
| NM_020922 | WNK3     | WNK lysine deficient protein kinase 3                                | -1,82 | 4,78E-02 | 8,10E-03 | 1,22  | 8,06E-01 |
| NM_004614 | TK2      | thymidine kinase 2, mitochondrial                                    | -1,30 | 4,11E-01 | 8,82E-02 | 1,17  | 1,00E+00 |
| NM_020240 | CDC42SE2 | CDC42 small effector 2                                               | -1,37 | 4,11E-01 | 8,71E-02 | 1,44  | 1,00E+00 |

|           |           |                                                                     |       |          |          |       |          |
|-----------|-----------|---------------------------------------------------------------------|-------|----------|----------|-------|----------|
| NM_033126 | PSKH2     | protein serine kinase H2                                            | -1,82 | 4,78E-02 | 8,34E-03 | -1,71 | 7,71E-02 |
| NM_005456 | MAPK8IP1  | mitogen-activated protein kinase 8 interacting protein 1            | -1,80 | 4,78E-02 | 8,72E-03 | 1,13  | 8,06E-01 |
| NM_000389 | CDKN1A    | cyclin-dependent kinase inhibitor 1A (p21, Cip1)                    | -1,79 | 4,78E-02 | 8,79E-03 | 1,70  | 7,71E-02 |
| NM_020804 | PACSIN1   | protein kinase C and casein kinase substrate in neurons 1           | -1,80 | 4,78E-02 | 8,84E-03 | -1,06 | 1,00E+00 |
| NM_004935 | CDK5      | cyclin-dependent kinase 5                                           | -1,79 | 4,78E-02 | 8,91E-03 | 1,34  | 2,38E-01 |
| NM_031432 | UCK1      | uridine-cytidine kinase 1                                           | -1,80 | 4,78E-02 | 8,90E-03 | -1,65 | 3,88E-02 |
| NM_032840 | FLJ14800  | hypothetical protein FLJ14800                                       | -1,80 | 4,78E-02 | 8,91E-03 | 1,03  | 1,00E+00 |
| NM_002356 | MARCKS    | myristoylated alanine-rich protein kinase C substrate               | -1,34 | 4,11E-01 | 8,32E-02 | 2,38  | 2,16E-02 |
| NM_001616 | ACVR2     | activin A receptor, type II                                         | -1,79 | 4,78E-02 | 8,95E-03 | 2,25  | 3,19E-02 |
| NM_007170 | TESK2     | testis-specific kinase 2                                            | -1,80 | 4,78E-02 | 8,98E-03 | 1,43  | 1,17E-01 |
| NM_016282 | AK3L1     | adenylate kinase 3 like 1                                           | -1,37 | 3,76E-01 | 8,24E-02 | 1,49  | 7,71E-02 |
| NM_013392 | NRBP      | nuclear receptor binding protein                                    | -1,80 | 4,78E-02 | 9,22E-03 | 1,78  | 3,19E-02 |
| NM_004448 | ERBB2     | v-erb-b2 erythroblastic leukemia viral oncogene homolog 2, neuro/   | -1,39 | 3,76E-01 | 8,13E-02 | 1,53  | 9,16E-02 |
| NM_004586 | RPS6KA3   | ribosomal protein S6 kinase, 90kDa, polypeptide 3                   | -1,34 | 3,76E-01 | 8,11E-02 | 2,21  | 1,86E-02 |
| NM_005983 | SKP2      | S-phase kinase-associated protein 2 (p45)                           | -1,78 | 4,78E-02 | 9,31E-03 | 1,27  | 3,97E-01 |
| NM_018492 | PBK       | PDZ binding kinase                                                  | -1,79 | 4,78E-02 | 9,51E-03 | -1,90 | 7,71E-02 |
| NM_004445 | EPHB6     | EPH receptor B6                                                     | -1,78 | 4,78E-02 | 9,64E-03 | -1,25 | 2,99E-01 |
| NM_018401 | STK32B    | serine/threonine kinase 32B                                         | -1,79 | 4,78E-02 | 9,62E-03 | -2,39 | 1,47E-02 |
| NM_174922 | ADCK5     | aarF domain containing kinase 5                                     | -1,39 | 3,76E-01 | 7,88E-02 | 1,84  | 2,38E-02 |
| NM_002576 | PAK1      | p21/Cdc42/Rac1-activated kinase 1 (STE20 homolog, yeast)            | -1,79 | 5,23E-02 | 9,74E-03 | 1,51  | 7,71E-02 |
| NM_002115 | HK3       | hexokinase 3 (white cell)                                           | -1,38 | 3,76E-01 | 7,74E-02 | 1,54  | 2,61E-01 |
| NM_006296 | VRK2      | vaccinia related kinase 2                                           | -1,33 | 3,76E-01 | 7,67E-02 | 2,31  | 2,38E-02 |
| NM_182948 | PRKACB    | protein kinase, cAMP-dependent, catalytic, beta                     | -1,78 | 5,23E-02 | 1,02E-02 | 2,08  | 4,31E-02 |
| NM_006343 | MERTK     | c-mer proto-oncogene tyrosine kinase                                | -1,77 | 5,23E-02 | 1,02E-02 | 1,28  | 2,61E-01 |
| NM_005592 | MUSK      | muscle, skeletal, receptor tyrosine kinase                          | -1,77 | 5,23E-02 | 1,03E-02 | 1,25  | 2,99E-01 |
| NM_002746 | MAPK3     | mitogen-activated protein kinase 3                                  | -1,77 | 6,82E-02 | 1,04E-02 | 1,11  | 1,00E+00 |
| NM_025228 | T3JAM     | TRAF3-interacting Jun N-terminal kinase (JNK)-activating modulat    | -1,40 | 3,76E-01 | 7,44E-02 | 1,01  | 1,00E+00 |
| NM_152528 | WDSAM1    | WD repeat and SAM domain containing 1                               | -1,40 | 3,20E-01 | 7,42E-02 | 2,24  | 1,47E-02 |
| NM_006252 | PRKAA2    | protein kinase, AMP-activated, alpha 2 catalytic subunit            | -1,36 | 3,20E-01 | 7,37E-02 | 2,73  | 8,26E-03 |
| NM_002419 | MAP3K11   | mitogen-activated protein kinase kinase kinase 11                   | -1,38 | 3,20E-01 | 7,34E-02 | 1,07  | 1,00E+00 |
| NM_001259 | CDK6      | cyclin-dependent kinase 6                                           | -1,74 | 6,82E-02 | 1,08E-02 | 2,48  | 1,47E-02 |
| NM_003137 | SRPK1     | SFRS protein kinase 1                                               | -1,76 | 7,86E-02 | 1,09E-02 | 1,27  | 3,97E-01 |
| NM_006314 | CNKS1R    | connector enhancer of kinase suppressor of Ras 1                    | -1,39 | 3,20E-01 | 7,10E-02 | 2,30  | 1,47E-02 |
| NM_004438 | EPHA4     | EPH receptor A4                                                     | -1,41 | 3,20E-01 | 7,08E-02 | 1,96  | 3,88E-02 |
| NM_003551 | NME5      | non-metastatic cells 5, protein expressed in (nucleoside-diphosphat | -1,41 | 3,20E-01 | 7,09E-02 | 1,59  | 7,71E-02 |
| NM_139158 | ALS2CR7   | amyotrophic lateral sclerosis 2 (juvenile) chromosome region, canc  | -1,41 | 3,20E-01 | 6,97E-02 | -1,59 | 1,56E-01 |
| NM_001895 | CSNK2A1   | casein kinase 2, alpha 1 polypeptide                                | -1,39 | 3,20E-01 | 6,75E-02 | 2,48  | 1,86E-02 |
| NM_138733 | PGK2      | phosphoglycerate kinase 2                                           | -1,73 | 7,86E-02 | 1,20E-02 | 1,15  | 1,00E+00 |
| AB033076  | KIDINS220 | likely homolog of rat kinase D-interacting substance of 220 kDa     | -1,74 | 7,86E-02 | 1,21E-02 | 1,21  | 3,97E-01 |
| NM_003159 | CDKL5     | cyclin-dependent kinase-like 5                                      | -1,42 | 3,20E-01 | 6,60E-02 | 1,64  | 4,31E-02 |
| NM_002750 | MAPK8     | mitogen-activated protein kinase 8                                  | -1,74 | 7,86E-02 | 1,24E-02 | 1,44  | 9,16E-02 |
| NM_002093 | GSK3B     | glycogen synthase kinase 3 beta                                     | -1,73 | 7,86E-02 | 1,26E-02 | 2,13  | 4,87E-02 |

|              |          |                                                                      |       |          |          |       |          |
|--------------|----------|----------------------------------------------------------------------|-------|----------|----------|-------|----------|
| NM_014776    | GIT2     | G protein-coupled receptor kinase interactor 2                       | -1,42 | 3,20E-01 | 6,47E-02 | -1,19 | 3,97E-01 |
| NM_002031    | FRK      | fyn-related kinase                                                   | -1,71 | 7,86E-02 | 1,27E-02 | 1,32  | 2,77E-01 |
| NM_198452    | PNCK     | pregnancy upregulated non-ubiquitously expressed CaM kinase          | -1,73 | 7,86E-02 | 1,27E-02 | -1,09 | 1,00E+00 |
| NM_016507    | CRK7     | CDC2-related protein kinase 7                                        | -1,43 | 3,20E-01 | 6,31E-02 | 2,11  | 1,47E-02 |
| NM_002613    | PDPK1    | 3-phosphoinositide dependent protein kinase-1                        | -1,68 | 7,86E-02 | 1,33E-02 | 1,04  | 1,00E+00 |
| NM_001291    | CLK2     | CDC-like kinase 2                                                    | -1,44 | 3,20E-01 | 6,16E-02 | 1,18  | 1,00E+00 |
| NM_016508    | CDKL3    | cyclin-dependent kinase-like 3                                       | -1,72 | 7,86E-02 | 1,35E-02 | 3,05  | 8,26E-03 |
| NM_020666    | CLK4     | CDC-like kinase 4                                                    | -1,44 | 3,20E-01 | 6,13E-02 | 1,52  | 9,16E-02 |
| NM_014002    | IKBKE    | inhibitor of kappa light polypeptide gene enhancer in B-cells, kinas | -1,44 | 3,20E-01 | 5,99E-02 | 1,03  | 1,00E+00 |
| NM_017567    | NAGK     | N-acetylglucosamine kinase                                           | -1,71 | 7,86E-02 | 1,40E-02 | -1,58 | 4,87E-02 |
| NM_001894    | CSNK1E   | casein kinase 1, epsilon                                             | -1,70 | 7,86E-02 | 1,41E-02 | 1,49  | 7,71E-02 |
| NM_024652    | LRRK1    | leucine-rich repeat kinase 1                                         | -1,71 | 7,86E-02 | 1,43E-02 | -1,16 | 5,50E-01 |
| NM_20975     | RET      | ret proto-oncogene (multiple endocrine neoplasia and medullary th    | -1,44 | 2,76E-01 | 5,83E-02 | 1,70  | 7,71E-02 |
| NM_006281    | STK3     | serine/threonine kinase 3 (STE20 homolog, yeast)                     | -1,37 | 3,20E-01 | 5,83E-02 | 1,58  | 8,06E-01 |
| NM_001105    | ACVR1    | activin A receptor, type I                                           | -1,39 | 2,76E-01 | 5,80E-02 | 1,27  | 2,61E-01 |
| NM_000076    | CDKN1C   | cyclin-dependent kinase inhibitor 1C (p57, Kip2)                     | -1,69 | 7,86E-02 | 1,46E-02 | 1,50  | 7,71E-02 |
| NM_001024401 | SBK1     | SH3-binding domain kinase 1                                          | -1,70 | 7,86E-02 | 1,48E-02 | 1,91  | 2,38E-02 |
| NM_199289    | MGC75495 | similar to Serine/threonine-protein kinase Nek1 (NimA-related prot   | -1,69 | 7,86E-02 | 1,49E-02 | 1,17  | 5,50E-01 |
| NM_002253    | KDR      | kinase insert domain receptor (a type III receptor tyrosine kinase)  | -1,44 | 2,76E-01 | 5,68E-02 | 1,42  | 1,62E-01 |
| NM_018423    | STYK1    | serine/threonine/tyrosine kinase 1                                   | -1,31 | 2,76E-01 | 5,66E-02 | -1,63 | 7,71E-02 |
| NM_001220    | CAMK2B   | calcium/calmodulin-dependent protein kinase (CaM kinase) II beta     | -1,20 | 2,76E-01 | 5,63E-02 | 1,01  | 8,06E-01 |
| NM_002498    | NEK3     | NIMA (never in mitosis gene a)-related kinase 3                      | -1,68 | 7,86E-02 | 1,54E-02 | 1,20  | 1,00E+00 |
| NM_004302    | ACVR1B   | activin A receptor, type IB                                          | -1,46 | 2,76E-01 | 5,50E-02 | 3,12  | 8,26E-03 |
| NM_002314    | LIMK1    | LIM domain kinase 1                                                  | -1,46 | 2,76E-01 | 5,49E-02 | -1,24 | 2,99E-01 |
| NM_006206    | PDGFRA   | platelet-derived growth factor receptor, alpha polypeptide           | -1,63 | 7,86E-02 | 1,59E-02 | 1,06  | 1,00E+00 |
| NM_002737    | PRKCA    | protein kinase C, alpha                                              | -1,44 | 2,76E-01 | 5,40E-02 | 2,22  | 1,47E-02 |
| NM_002530    | NTRK3    | neurotrophic tyrosine kinase, receptor, type 3                       | -1,69 | 7,86E-02 | 1,60E-02 | 2,71  | 1,86E-02 |
| NM_006035    | CDC42BPB | CDC42 binding protein kinase beta (DMPK-like)                        | -1,46 | 2,76E-01 | 5,39E-02 | 1,02  | 1,00E+00 |
| NM_005751    | AKAP9    | A kinase (PRKA) anchor protein (yotiao) 9                            | -1,68 | 7,86E-02 | 1,64E-02 | 2,08  | 2,02E-02 |
| NM_007174    | CIT      | citron (rho-interacting, serine/threonine kinase 21)                 | -1,67 | 7,86E-02 | 1,64E-02 | 1,46  | 7,71E-02 |
| NM_002591    | PCK1     | phosphoenolpyruvate carboxykinase 1 (soluble)                        | -1,68 | 7,86E-02 | 1,66E-02 | 1,65  | 2,61E-01 |
| NM_003913    | PRPF4B   | PRP4 pre-mRNA processing factor 4 homolog B (yeast)                  | -1,67 | 7,86E-02 | 1,67E-02 | 1,13  | 1,00E+00 |
| NM_002741    | PKN1     | protein kinase N1                                                    | -1,62 | 7,86E-02 | 1,69E-02 | -1,30 | 3,41E-01 |
| NM_002953    | RPS6KA1  | ribosomal protein S6 kinase, 90kDa, polypeptide 1                    | -1,44 | 2,76E-01 | 5,13E-02 | 1,86  | 7,71E-02 |
| NM_014326    | DAPK2    | death-associated protein kinase 2                                    | -1,68 | 1,15E-01 | 1,69E-02 | 1,78  | 3,88E-02 |
| NM_000289    | PFKM     | phosphofructokinase, muscle                                          | -1,43 | 2,76E-01 | 5,00E-02 | 1,24  | 3,97E-01 |
| NM_003985    | TNK1     | tyrosine kinase, non-receptor, 1                                     | -1,66 | 1,15E-01 | 1,81E-02 | -1,61 | 7,71E-02 |
| NM_001569    | IRAK1    | interleukin-1 receptor-associated kinase 1                           | -1,48 | 2,76E-01 | 4,76E-02 | 1,76  | 4,87E-02 |
| NM_002221    | ITPKB    | inositol 1,4,5-trisphosphate 3-kinase B                              | -1,65 | 1,15E-01 | 1,88E-02 | -1,23 | 3,97E-01 |
| NM_004336    | BUB1     | BUB1 budding uninhibited by benzimidazoles 1 homolog (yeast)         | -1,47 | 2,76E-01 | 4,69E-02 | 1,55  | 9,16E-02 |
| NM_022740    | HIPK2    | homeodomain interacting protein kinase 2                             | -1,49 | 2,76E-01 | 4,57E-02 | 1,25  | 3,97E-01 |
| NM_001347    | DGKQ     | diacylglycerol kinase, theta 110kDa                                  | -1,65 | 1,15E-01 | 1,98E-02 | 1,98  | 3,88E-02 |

|           |         |                                                                          |       |          |          |       |          |
|-----------|---------|--------------------------------------------------------------------------|-------|----------|----------|-------|----------|
| NM_012398 | PIP5K1C | phosphatidylinositol-4-phosphate 5-kinase, type I, gamma                 | -1,65 | 1,15E-01 | 2,00E-02 | 1,17  | 5,50E-01 |
| NM_022048 | CSNK1G1 | casein kinase 1, gamma 1                                                 | -1,50 | 2,76E-01 | 4,45E-02 | 2,09  | 1,86E-02 |
| NM_054111 | IHPK3   | inositol hexaphosphate kinase 3                                          | -1,65 | 1,15E-01 | 2,01E-02 | 1,41  | 9,16E-02 |
| NM_003582 | DYRK3   | dual-specificity tyrosine-(Y)-phosphorylation regulated kinase 3         | -1,44 | 1,99E-01 | 4,39E-02 | 2,29  | 2,02E-02 |
| NM_001320 | CSNK2B  | casein kinase 2, beta polypeptide                                        | -1,64 | 1,15E-01 | 2,04E-02 | 1,61  | 7,71E-02 |
| NM_020439 | CAMK1G  | calcium/calmodulin-dependent protein kinase IG                           | -1,50 | 1,99E-01 | 4,37E-02 | 1,15  | 1,00E+00 |
| NM_005476 | GNE     | glucosamine (UDP-N-acetyl)-2-epimerase/N-acetylmannosamine k             | -1,64 | 1,15E-01 | 2,05E-02 | 1,30  | 2,61E-01 |
| NM_015028 | TNIK    | TRAF2 and NCK interacting kinase                                         | -1,49 | 1,99E-01 | 4,34E-02 | 1,48  | 7,71E-02 |
| NM_002376 | MARK3   | MAP/microtubule affinity-regulating kinase 3                             | -1,61 | 1,15E-01 | 2,08E-02 | 1,60  | 4,31E-02 |
| NM_014572 | LATS2   | LATS, large tumor suppressor, homolog 2 (Drosophila)                     | -1,51 | 1,99E-01 | 4,23E-02 | 1,45  | 9,16E-02 |
| NM_001825 | CKMT2   | creatine kinase, mitochondrial 2 (sarcomeric)                            | -1,62 | 1,15E-01 | 2,13E-02 | 2,79  | 1,47E-02 |
| NM_003718 | CDC2L5  | cell division cycle 2-like 5 (cholinesterase-related cell division conti | -1,59 | 1,15E-01 | 2,14E-02 | 1,88  | 3,19E-02 |
| NM_007064 | TRAD    | serine/threonine kinase with Dbl- and pleckstrin homology domains        | -1,51 | 1,99E-01 | 4,21E-02 | 1,07  | 1,00E+00 |
| NM_198578 | LRRK2   | leucine-rich repeat kinase 2                                             | -1,62 | 1,15E-01 | 2,17E-02 | 2,38  | 1,47E-02 |
| NM_005308 | GRK5    | G protein-coupled receptor kinase 5                                      | 1,11  | 1,00E+00 | 5,83E-01 | 5,22  | 8,26E-03 |
| NM_003886 | AKAP4   | A kinase (PRKA) anchor protein 4                                         | -1,60 | 1,15E-01 | 2,19E-02 | 1,70  | 9,16E-02 |
| NM_002513 | NME3    | non-metastatic cells 3, protein expressed in                             | -1,25 | 1,99E-01 | 4,09E-02 | 1,25  | 1,00E+00 |
| NM_001800 | CDKN2D  | cyclin-dependent kinase inhibitor 2D (p19, inhibits CDK4)                | -1,62 | 1,15E-01 | 2,21E-02 | 1,59  | 7,71E-02 |
| NM_000788 | DCK     | deoxycytidine kinase                                                     | -1,62 | 1,15E-01 | 2,24E-02 | 1,42  | 9,16E-02 |
| NM_004119 | FLT3    | fms-related tyrosine kinase 3                                            | -1,51 | 1,99E-01 | 4,03E-02 | 1,43  | 2,61E-01 |
| NM_004329 | BMPR1A  | bone morphogenetic protein receptor, type IA                             | -1,50 | 1,99E-01 | 4,02E-02 | 2,58  | 8,26E-03 |
| NM_000188 | HK1     | hexokinase 1                                                             | -1,52 | 1,99E-01 | 3,99E-02 | 3,47  | 1,47E-02 |
| NM_002578 | PAK3    | p21 (CDKN1A)-activated kinase 3                                          | -1,51 | 1,99E-01 | 3,98E-02 | 1,69  | 3,88E-02 |
| NM_007284 | PTK9L   | PTK9L protein tyrosine kinase 9-like (A6-related protein)                | -1,61 | 1,15E-01 | 2,32E-02 | 1,22  | 8,06E-01 |
| NM_004954 | MARK2   | MAP/microtubule affinity-regulating kinase 2                             | -1,62 | 1,15E-01 | 2,33E-02 | 2,27  | 2,16E-02 |
| NM_004612 | TGFBR1  | transforming growth factor, beta receptor I (activin A receptor type     | -1,59 | 1,64E-01 | 2,35E-02 | 1,60  | 1,56E-01 |
| NM_015000 | STK38L  | serine/threonine kinase 38 like                                          | -1,51 | 1,99E-01 | 3,80E-02 | 2,63  | 8,26E-03 |
| NM_015191 | SNF1LK2 | SNF1-like kinase 2                                                       | -1,52 | 1,99E-01 | 3,80E-02 | 2,08  | 1,47E-02 |
| NM_021135 | RPS6KA2 | ribosomal protein S6 kinase, 90kDa, polypeptide 2                        | -1,40 | 1,99E-01 | 3,71E-02 | -1,15 | 8,06E-01 |
| NM_000291 | PGK1    | phosphoglycerate kinase 1                                                | -1,59 | 1,64E-01 | 2,47E-02 | 1,09  | 1,00E+00 |
| NM_014978 | SORCS3  | sortilin-related VPS10 domain containing receptor 3                      | -1,60 | 1,64E-01 | 2,49E-02 | -1,04 | 1,00E+00 |
| NM_005026 | PIK3CD  | phosphoinositide-3-kinase, catalytic, delta polypeptide                  | -1,55 | 1,99E-01 | 2,52E-02 | 1,33  | 2,61E-01 |
| NM_002650 | PIK4CA  | phosphatidylinositol 4-kinase, catalytic, alpha polypeptide              | -1,53 | 1,99E-01 | 3,63E-02 | 1,37  | 2,38E-01 |
| NM_004938 | DAPK1   | death-associated protein kinase 1                                        | -1,53 | 1,99E-01 | 3,51E-02 | 1,21  | 5,81E-01 |
| NM_014602 | PIK3R4  | phosphoinositide-3-kinase, regulatory subunit 4, p150                    | -1,52 | 1,99E-01 | 3,51E-02 | -1,21 | 3,97E-01 |
| NM_181504 | PIK3R1  | phosphoinositide-3-kinase, regulatory subunit 1 (p85 alpha)              | -1,54 | 1,99E-01 | 3,43E-02 | 1,49  | 2,38E-01 |
| NM_003384 | VRK1    | vaccinia related kinase 1                                                | -1,52 | 1,99E-01 | 3,47E-02 | 1,78  | 2,21E-01 |
| NM_032630 | CINP    | cyclin-dependent kinase 2-interacting protein                            | -1,54 | 1,99E-01 | 3,35E-02 | 1,31  | 2,61E-01 |
| NM_000020 | ACVRL1  | activin A receptor type II-like 1                                        | -1,58 | 1,99E-01 | 2,82E-02 | 1,85  | 2,38E-02 |
| NM_004304 | ALK     | anaplastic lymphoma kinase (Ki-1)                                        | -1,55 | 1,99E-01 | 3,26E-02 | 1,42  | 9,16E-02 |
| NM_005100 | AKAP12  | A kinase (PRKA) anchor protein (gravin) 12                               | -1,56 | 1,99E-01 | 3,23E-02 | 2,34  | 1,47E-02 |
| NM_014397 | NEK6    | NIMA (never in mitosis gene a)-related kinase 6                          | -1,55 | 1,99E-01 | 3,23E-02 | 1,20  | 3,97E-01 |

|              |           |                                                                      |       |          |          |       |          |
|--------------|-----------|----------------------------------------------------------------------|-------|----------|----------|-------|----------|
| NM_004936    | CDKN2B    | cyclin-dependent kinase inhibitor 2B (p15, inhibits CDK4)            | -1,55 | 1,99E-01 | 2,99E-02 | 2,90  | 8,26E-03 |
| NM_000142    | FGFR3     | fibroblast growth factor receptor 3 (achondroplasia, thanatophoric c | -1,57 | 1,99E-01 | 2,88E-02 | 2,17  | 7,71E-02 |
| NM_005923    | MAP3K5    | mitogen-activated protein kinase kinase kinase 5                     | -1,52 | 1,99E-01 | 3,09E-02 | 1,25  | 8,06E-01 |
| NM_000245    | MET       | met proto-oncogene (hepatocyte growth factor receptor)               | -1,55 | 1,99E-01 | 3,10E-02 | 2,02  | 2,02E-02 |
| NM_004566    | PFKFB3    | 6-phosphofructo-2-kinase/fructose-2,6-biphosphatase 3                | -1,57 | 1,99E-01 | 2,97E-02 | 1,47  | 9,16E-02 |
| NM_006609    | MAP3K2    | mitogen-activated protein kinase kinase kinase 2                     | 1,11  | 1,00E+00 | 5,88E-01 | 1,66  | 4,31E-02 |
| NM_004196    | CDKL1     | cyclin-dependent kinase-like 1 (CDC2-related kinase)                 | 1,20  | 1,00E+00 | 5,94E-01 | 3,09  | 4,87E-02 |
| NM_016478    | ZC3HC1    | zinc finger, C3HC type 1                                             | 1,07  | 1,00E+00 | 5,99E-01 | 1,57  | 9,16E-02 |
| NM_013257    | SGKL      | serum/glucocorticoid regulated kinase-like                           | 1,07  | 1,00E+00 | 6,02E-01 | 2,47  | 8,26E-03 |
| NM_006871    | RIPK3     | receptor-interacting serine-threonine kinase 3                       | 1,10  | 1,00E+00 | 6,05E-01 | 2,04  | 1,86E-02 |
| NM_018339    | RFK       | riboflavin kinase                                                    | 1,07  | 1,00E+00 | 6,06E-01 | 1,58  | 4,87E-02 |
| NM_002658    | PLAU      | plasminogen activator, urokinase                                     | 1,07  | 1,00E+00 | 6,10E-01 | 2,89  | 8,26E-03 |
| NM_006875    | PIM2      | pim-2 oncogene                                                       | 1,08  | 1,00E+00 | 6,10E-01 | 2,19  | 1,47E-02 |
| NM_012119    | CCRK      | cell cycle related kinase                                            | 1,07  | 1,00E+00 | 6,14E-01 | 1,67  | 3,88E-02 |
| NM_004226    | STK17B    | serine/threonine kinase 17b (apoptosis-inducing)                     | 1,23  | 1,00E+00 | 6,32E-01 | 1,82  | 2,57E-02 |
| NM_014413    | EIF2AK1   | eukaryotic translation initiation factor 2-alpha kinase 1            | 1,08  | 1,00E+00 | 6,32E-01 | 1,59  | 4,87E-02 |
| NM_014308    | PIK3R5    | phosphoinositide-3-kinase, regulatory subunit 5, p101                | 1,08  | 1,00E+00 | 6,36E-01 | 2,53  | 8,26E-03 |
| NM_003821    | RIPK2     | receptor-interacting serine-threonine kinase 2                       | 1,15  | 1,00E+00 | 6,55E-01 | 1,59  | 9,16E-02 |
| NM_181805    | PKIG      | protein kinase (cAMP-dependent, catalytic) inhibitor gamma           | 1,13  | 1,00E+00 | 6,56E-01 | -1,02 | 1,00E+00 |
| NM_005109    | OXS1      | oxidative-stress responsive 1                                        | 1,12  | 1,00E+00 | 6,56E-01 | 2,09  | 1,47E-02 |
| NM_012395    | PFTK1     | PFTAIRE protein kinase 1                                             | 1,13  | 1,00E+00 | 6,58E-01 | 1,46  | 7,71E-02 |
| NM_145040    | PRKCDPB   | protein kinase C, delta binding protein                              | 1,10  | 1,00E+00 | 6,62E-01 | 1,62  | 2,77E-01 |
| XM_372663    | LOC390777 | similar to Ribosomal protein S6 kinase I (S6K) (P70-S6K)             | 1,13  | 1,00E+00 | 6,64E-01 | 1,52  | 7,71E-02 |
| NM_003954    | MAP3K14   | mitogen-activated protein kinase kinase kinase 14                    | 1,16  | 1,00E+00 | 6,64E-01 | 1,56  | 7,71E-02 |
| NM_004783    | TAOK2     | TAO kinase 2                                                         | 1,13  | 1,00E+00 | 6,75E-01 | 1,57  | 7,71E-02 |
| XM_497791    | LOC391295 | similar to spermiogenesis associated serine/threonine kinase 22D;    | 1,16  | 1,00E+00 | 6,79E-01 | 1,48  | 7,71E-02 |
| NM_013276    | CARKL     | carbohydrate kinase-like                                             | 1,12  | 1,00E+00 | 6,87E-01 | 1,90  | 2,38E-02 |
| NM_002446    | MAP3K10   | mitogen-activated protein kinase kinase kinase 10                    | 1,12  | 1,00E+00 | 6,88E-01 | 2,17  | 3,88E-02 |
| NM_000294    | PHKG2     | phosphorylase kinase, gamma 2 (testis)                               | 1,19  | 1,00E+00 | 6,90E-01 | 1,81  | 4,87E-02 |
| NM_017859    | UCKL1     | uridine-cytidine kinase 1-like 1                                     | 1,12  | 1,00E+00 | 6,94E-01 | 1,65  | 4,87E-02 |
| NM_004690    | LATS1     | LATS, large tumor suppressor, homolog 1 (Drosophila)                 | 1,14  | 1,00E+00 | 6,98E-01 | 3,31  | 1,47E-02 |
| NM_001009565 | CDKL4     | cyclin-dependent kinase-like 4                                       | 1,14  | 1,00E+00 | 7,06E-01 | 2,37  | 1,47E-02 |
| NM_006251    | PRKAA1    | protein kinase, AMP-activated, alpha 1 catalytic subunit             | 1,22  | 1,00E+00 | 7,26E-01 | 2,34  | 2,38E-02 |
| NM_014496    | RPS6KA6   | ribosomal protein S6 kinase, 90kDa, polypeptide 6                    | 1,15  | 1,00E+00 | 7,30E-01 | 2,29  | 1,47E-02 |
| NM_002609    | PDGFRB    | platelet-derived growth factor receptor, beta polypeptide            | 1,33  | 1,00E+00 | 7,33E-01 | 2,92  | 3,88E-02 |
| NM_002944    | ROS1      | v-ros UR2 sarcoma virus oncogene homolog 1 (avian)                   | 1,16  | 1,00E+00 | 7,42E-01 | 2,55  | 3,88E-02 |
| NM_031414    | STK31     | serine/threonine kinase 31                                           | 1,19  | 1,00E+00 | 7,44E-01 | 3,23  | 3,88E-02 |
| NM_024876    | ADCK4     | aarF domain containing kinase 4                                      | 1,17  | 1,00E+00 | 7,47E-01 | 1,31  | 8,06E-01 |
| NM_002401    | MAP3K3    | mitogen-activated protein kinase kinase kinase 3                     | 1,20  | 1,00E+00 | 7,50E-01 | 3,07  | 1,86E-02 |
| NM_005406    | ROCK1     | Rho-associated, coiled-coil containing protein kinase 1              | 1,22  | 1,00E+00 | 7,52E-01 | 3,81  | 8,26E-03 |
| NM_139209    | GRK7      | G protein-coupled receptor kinase 7                                  | 1,18  | 1,00E+00 | 7,52E-01 | 4,78  | 8,26E-03 |
| NM_018208    | ETNK2     | ethanolamine kinase 2                                                | 1,19  | 1,00E+00 | 7,64E-01 | 3,34  | 8,26E-03 |

|           |           |                                                                       |      |          |          |       |          |
|-----------|-----------|-----------------------------------------------------------------------|------|----------|----------|-------|----------|
| NM_003215 | TEC       | tec protein tyrosine kinase                                           | 1,25 | 1,00E+00 | 7,67E-01 | 2,07  | 3,19E-02 |
| NM_005204 | MAP3K8    | mitogen-activated protein kinase kinase kinase 8                      | 1,19 | 1,00E+00 | 7,76E-01 | 1,94  | 3,88E-02 |
| NM_005906 | MAK       | male germ cell-associated kinase                                      | 1,19 | 1,00E+00 | 7,79E-01 | 3,22  | 1,47E-02 |
| NM_012324 | MAPK8IP2  | mitogen-activated protein kinase 8 interacting protein 2              | 1,19 | 1,00E+00 | 7,79E-01 | 2,97  | 8,26E-03 |
| NM_006293 | TYRO3     | TYRO3 protein tyrosine kinase                                         | 1,20 | 1,00E+00 | 7,90E-01 | 2,76  | 8,26E-03 |
| NM_182493 | LOC91807  | myosin light chain kinase (MLCK)                                      | 1,21 | 1,00E+00 | 7,92E-01 | -1,36 | 2,99E-01 |
| NM_002447 | MST1R     | macrophage stimulating 1 receptor (c-met-related tyrosine kinase)     | 1,21 | 1,00E+00 | 7,94E-01 | 3,80  | 8,26E-03 |
| NM_004157 | PRKAR2A   | protein kinase, cAMP-dependent, regulatory, type II, alpha            | 1,21 | 1,00E+00 | 8,01E-01 | 2,54  | 8,26E-03 |
| NM_005424 | TIE1      | tyrosine kinase with immunoglobulin-like and EGF-like domains 1       | 1,27 | 1,00E+00 | 8,04E-01 | 2,59  | 1,47E-02 |
| NM_000221 | KHK       | ketoheokinase (fructokinase)                                          | 1,22 | 1,00E+00 | 8,05E-01 | 2,79  | 8,26E-03 |
| NM_016281 | TAOK3     | TAO kinase 3                                                          | 1,27 | 1,00E+00 | 8,07E-01 | 3,07  | 8,26E-03 |
| NM_003583 | DYRK2     | dual-specificity tyrosine-(Y)-phosphorylation regulated kinase 2      | 1,26 | 1,00E+00 | 8,20E-01 | 3,05  | 1,47E-02 |
| NM_016248 | AKAP11    | A kinase (PRKA) anchor protein 11                                     | 1,28 | 1,00E+00 | 8,20E-01 | 2,17  | 1,47E-02 |
| NM_006301 | MAP3K12   | mitogen-activated protein kinase kinase kinase 12                     | 1,30 | 1,00E+00 | 8,23E-01 | 2,39  | 2,38E-02 |
| NM_003160 | AURKC     | aurora kinase C                                                       | 1,30 | 1,00E+00 | 8,27E-01 | 2,07  | 3,19E-02 |
| NM_183048 | PRKCBP1   | protein kinase C binding protein 1                                    | 1,27 | 1,00E+00 | 8,39E-01 | 4,51  | 8,26E-03 |
| NM_175886 | PRPS1L1   | phosphoribosyl pyrophosphate synthetase 1-like 1                      | 1,28 | 1,00E+00 | 8,39E-01 | 2,37  | 1,47E-02 |
| NM_002880 | RAF1      | v-raf-1 murine leukemia viral oncogene homolog 1                      | 1,32 | 1,00E+00 | 8,40E-01 | 2,84  | 2,32E-02 |
| BC028192  | LOC161635 | similar to casein kinase I alpha                                      | 1,26 | 1,00E+00 | 8,40E-01 | 1,98  | 2,16E-02 |
| NM_182471 | PKM2      | pyruvate kinase, muscle                                               | 1,36 | 1,00E+00 | 8,43E-01 | 1,70  | 3,88E-02 |
| NM_145203 | CSNK1A1L  | casein kinase 1, alpha 1-like                                         | 1,26 | 1,00E+00 | 8,44E-01 | 1,70  | 3,88E-02 |
| NM_033516 | NYD-SP25  | protein kinase NYD-SP25                                               | 1,33 | 1,00E+00 | 8,49E-01 | 1,95  | 2,02E-02 |
| NM_000298 | PKLR      | pyruvate kinase, liver and RBC                                        | 1,63 | 1,00E+00 | 8,60E-01 | 1,71  | 3,88E-02 |
| NM_198828 | LOC375449 | similar to microtubule associated testis specific serine/threonine pr | 1,29 | 1,00E+00 | 8,63E-01 | 2,90  | 8,26E-03 |
| NM_006457 | PDLIM5    | PDZ and LIM domain 5                                                  | 1,35 | 1,00E+00 | 8,69E-01 | 3,71  | 8,26E-03 |
| NM_012290 | TLK1      | tousled-like kinase 1                                                 | 1,31 | 1,00E+00 | 8,69E-01 | 2,71  | 8,26E-03 |
| NM_005793 | NME6      | non-metastatic cells 6, protein expressed in (nucleoside-diphospha    | 1,36 | 1,00E+00 | 8,74E-01 | 1,89  | 3,88E-02 |
| NM_000858 | GUK1      | guanylate kinase 1                                                    | 1,34 | 1,00E+00 | 8,77E-01 | 2,36  | 1,47E-02 |
| NM_002734 | PRKAR1A   | protein kinase, cAMP-dependent, regulatory, type I, alpha (tissue s   | 1,34 | 1,00E+00 | 8,79E-01 | 2,09  | 9,16E-02 |
| NM_001625 | AK2       | adenylate kinase 2                                                    | 1,32 | 1,00E+00 | 8,81E-01 | 2,20  | 1,47E-02 |
| NM_003656 | CAMK1     | calcium/calmodulin-dependent protein kinase I                         | 1,48 | 1,00E+00 | 8,82E-01 | 8,31  | 8,26E-03 |
| NM_173500 | TTBK2     | tau tubulin kinase 2                                                  | 1,33 | 1,00E+00 | 8,84E-01 | 2,53  | 8,26E-03 |
| NM_005399 | PRKAB2    | protein kinase, AMP-activated, beta 2 non-catalytic subunit           | 1,42 | 1,00E+00 | 8,86E-01 | 3,19  | 8,26E-03 |
| NM_006259 | PRKG2     | protein kinase, cGMP-dependent, type II                               | 1,44 | 1,00E+00 | 8,88E-01 | 2,06  | 1,86E-02 |
| NM_005465 | AKT3      | v-akt murine thymoma viral oncogene homolog 3 (protein kinase B       | 1,33 | 1,00E+00 | 8,88E-01 | 2,11  | 1,47E-02 |
| NM_177990 | PAK7      | p21(CDKN1A)-activated kinase 7                                        | 1,35 | 1,00E+00 | 8,95E-01 | 1,64  | 4,31E-02 |
| NM_178813 | AKAP14    | A kinase (PRKA) anchor protein 14                                     | 1,38 | 1,00E+00 | 9,00E-01 | 3,06  | 8,26E-03 |
| NM_022445 | TPK1      | thiamin pyrophosphokinase 1                                           | 1,38 | 1,00E+00 | 9,08E-01 | 1,66  | 3,88E-02 |
| NM_001824 | CKM       | creatine kinase, muscle                                               | 1,37 | 1,00E+00 | 9,11E-01 | 3,07  | 8,26E-03 |
| NM_017431 | PRKAG3    | protein kinase, AMP-activated, gamma 3 non-catalytic subunit          | 1,39 | 1,00E+00 | 9,11E-01 | 1,80  | 3,88E-02 |
| NM_006254 | PRKCD     | protein kinase C, delta                                               | 1,38 | 1,00E+00 | 9,13E-01 | 3,53  | 8,26E-03 |
| NM_004439 | EPHA5     | EPH receptor A5                                                       | 1,39 | 1,00E+00 | 9,17E-01 | 1,45  | 9,16E-02 |

|           |           |                                                                         |      |          |          |       |          |
|-----------|-----------|-------------------------------------------------------------------------|------|----------|----------|-------|----------|
| NM_014791 | MELK      | maternal embryonic leucine zipper kinase                                | 1,39 | 1,00E+00 | 9,18E-01 | 1,93  | 2,38E-02 |
| NM_020965 | MAGI-3    | membrane-associated guanylate kinase-related (MAGI-3)                   | 1,39 | 1,00E+00 | 9,22E-01 | 2,58  | 8,26E-03 |
| NR_002144 | LOC407835 | mitogen-activated protein kinase kinase 2 pseudogene                    | 1,40 | 1,00E+00 | 9,24E-01 | 3,97  | 8,26E-03 |
| NM_007202 | AKAP10    | A kinase (PRKA) anchor protein 10                                       | 1,46 | 1,00E+00 | 9,25E-01 | 1,73  | 7,71E-02 |
| XM_372749 | LOC390975 | similar to protein kinase Bsk146                                        | 1,43 | 1,00E+00 | 9,26E-01 | 1,76  | 3,19E-02 |
| NM_003691 | STK16     | serine/threonine kinase 16                                              | 4,53 | 1,00E+00 | 1,00E+00 | 11,17 | 8,26E-03 |
| NM_002378 | MATK      | megakaryocyte-associated tyrosine kinase                                | 1,53 | 1,00E+00 | 9,43E-01 | 3,45  | 8,26E-03 |
| NM_198465 | NRK       | Nik related kinase                                                      | 1,46 | 1,00E+00 | 9,43E-01 | 2,19  | 1,47E-02 |
| NM_001261 | CDK9      | cyclin-dependent kinase 9 (CDC2-related kinase)                         | 1,48 | 1,00E+00 | 9,43E-01 | 2,71  | 8,26E-03 |
| NM_014920 | ICK       | intestinal cell (MAK-like) kinase                                       | 1,54 | 1,00E+00 | 9,44E-01 | 2,68  | 1,47E-02 |
| NM_139021 | ERK8      | extracellular signal-regulated kinase 8                                 | 1,47 | 1,00E+00 | 9,46E-01 | 1,68  | 3,88E-02 |
| NM_032430 | BRSK1     | BR serine/threonine kinase 1                                            | 1,47 | 1,00E+00 | 9,49E-01 | 1,75  | 4,31E-02 |
| NM_005027 | PIK3R2    | phosphoinositide-3-kinase, regulatory subunit 2 (p85 beta)              | 1,49 | 1,00E+00 | 9,50E-01 | 2,57  | 1,47E-02 |
| NM_006253 | PRKAB1    | protein kinase, AMP-activated, beta 1 non-catalytic subunit             | 1,69 | 1,00E+00 | 9,58E-01 | 2,96  | 8,26E-03 |
| NM_016151 | TAOK2     | TAO kinase 2                                                            | 1,52 | 1,00E+00 | 9,60E-01 | 1,54  | 7,71E-02 |
| NM_020639 | RIPK4     | receptor-interacting serine-threonine kinase 4                          | 1,54 | 1,00E+00 | 9,64E-01 | 2,95  | 8,26E-03 |
| NM_004570 | PIK3C2G   | phosphoinositide-3-kinase, class 2, gamma polypeptide                   | 1,63 | 1,00E+00 | 9,65E-01 | 3,78  | 1,86E-02 |
| NM_152309 | PIK3AP1   | phosphoinositide-3-kinase adaptor protein 1                             | 1,55 | 1,00E+00 | 9,67E-01 | 2,62  | 8,26E-03 |
| XM_376585 | LOC285940 | similar to CDC-like kinase 2, isoform hckl2                             | 1,59 | 1,00E+00 | 9,70E-01 | 1,82  | 2,72E-02 |
| NM_002760 | PRKY      | protein kinase, Y-linked                                                | 1,58 | 1,00E+00 | 9,71E-01 | 2,88  | 1,86E-02 |
| NM_015148 | PASK      | PAS domain containing serine/threonine kinase                           | 1,59 | 1,00E+00 | 9,73E-01 | 2,29  | 1,47E-02 |
| NM_003690 | PRKRA     | protein kinase, interferon-inducible double stranded RNA depende        | 1,66 | 1,00E+00 | 9,74E-01 | 2,95  | 1,47E-02 |
| NM_005569 | LIMK2     | LIM domain kinase 2                                                     | 3,23 | 1,00E+00 | 1,00E+00 | 14,01 | 8,26E-03 |
| XM_498294 | LOC392265 | similar to Cell division protein kinase 5 (Tau protein kinase II cataly | 1,66 | 1,00E+00 | 9,77E-01 | 1,42  | 9,16E-02 |
| NM_005546 | ITK       | IL2-inducible T-cell kinase                                             | 1,65 | 1,00E+00 | 9,80E-01 | 2,40  | 1,47E-02 |
| NM_006759 | UGP2      | UDP-glucose pyrophosphorylase 2                                         | 1,67 | 1,00E+00 | 9,80E-01 | 3,62  | 1,47E-02 |
| NM_032409 | PINK1     | PTEN induced putative kinase 1                                          | 1,65 | 1,00E+00 | 9,80E-01 | 2,00  | 1,86E-02 |
| NM_001982 | ERBB3     | v-erb-b2 erythroblastic leukemia viral oncogene homolog 3 (avian)       | 1,65 | 1,00E+00 | 9,81E-01 | 3,97  | 8,26E-03 |
| NM_006257 | PRKCQ     | protein kinase C, theta                                                 | 1,69 | 1,00E+00 | 9,81E-01 | 1,48  | 7,71E-02 |
| NM_004717 | DGKI      | diacylglycerol kinase, iota                                             | 1,67 | 1,00E+00 | 9,82E-01 | 1,61  | 4,87E-02 |
| NM_002757 | MAP2K5    | mitogen-activated protein kinase kinase 5                               | 1,68 | 1,00E+00 | 9,82E-01 | 2,84  | 8,26E-03 |
| NM_144624 | UHMK1     | U2AF homology motif (UHM) kinase 1                                      | 1,67 | 1,00E+00 | 9,82E-01 | 2,66  | 8,26E-03 |
| NM_003674 | CDK10     | cyclin-dependent kinase (CDC2-like) 10                                  | 1,77 | 1,00E+00 | 9,82E-01 | 2,79  | 8,26E-03 |
| NM_006930 | SKP1A     | S-phase kinase-associated protein 1A (p19A)                             | 2,86 | 1,00E+00 | 1,00E+00 | 6,27  | 8,26E-03 |
| NM_002742 | PRKD1     | protein kinase D1                                                       | 1,71 | 1,00E+00 | 9,83E-01 | 4,10  | 1,47E-02 |
| NM_021972 | SPHK1     | sphingosine kinase 1                                                    | 1,73 | 1,00E+00 | 9,83E-01 | 4,13  | 1,47E-02 |
| NM_018216 | PANK4     | pantothenate kinase 4                                                   | 1,68 | 1,00E+00 | 9,83E-01 | 3,50  | 8,26E-03 |
| NM_002751 | MAPK11    | mitogen-activated protein kinase 11                                     | 1,74 | 1,00E+00 | 9,84E-01 | 4,91  | 8,26E-03 |
| NM_002738 | PRKCB1    | protein kinase C, beta 1                                                | 1,71 | 1,00E+00 | 9,85E-01 | 5,16  | 8,26E-03 |
| NM_016440 | VRK3      | vaccinia related kinase 3                                               | 1,75 | 1,00E+00 | 9,86E-01 | 2,73  | 8,26E-03 |
| NM_080823 | SRMS      | src-related kinase lacking C-terminal regulatory tyrosine and N-terr    | 2,61 | 1,00E+00 | 1,00E+00 | 3,18  | 8,26E-03 |
| NM_006556 | PMVK      | phosphomevalonate kinase                                                | 1,85 | 1,00E+00 | 9,90E-01 | 2,55  | 8,26E-03 |



|           |           |                                                                       |             |                 |          |             |                 |
|-----------|-----------|-----------------------------------------------------------------------|-------------|-----------------|----------|-------------|-----------------|
| NM_016223 | PACSIN3   | protein kinase C and casein kinase substrate in neurons 3             | <b>1,81</b> | <b>1,00E+00</b> | 9,90E-01 | <b>5,57</b> | <b>8,26E-03</b> |
| NM_006258 | PRKG1     | protein kinase, cGMP-dependent, type I                                | <b>2,38</b> | <b>1,00E+00</b> | 9,90E-01 | <b>5,49</b> | <b>1,47E-02</b> |
| NM_014006 | SMG1      | PI-3-kinase-related kinase SMG-1                                      | <b>1,80</b> | <b>1,00E+00</b> | 9,91E-01 | <b>2,48</b> | <b>1,47E-02</b> |
| NM_080836 | STK35     | serine/threonine kinase 35                                            | <b>1,82</b> | <b>1,00E+00</b> | 9,91E-01 | <b>2,18</b> | <b>1,47E-02</b> |
| NM_003646 | DGKZ      | diacylglycerol kinase, zeta 104kDa                                    | <b>2,01</b> | <b>1,00E+00</b> | 9,92E-01 | <b>4,48</b> | <b>8,26E-03</b> |
| NM_003688 | CASK      | calcium/calmodulin-dependent serine protein kinase (MAGUK fami        | <b>2,05</b> | <b>1,00E+00</b> | 9,92E-01 | <b>2,88</b> | <b>2,38E-02</b> |
| NM_153335 | LYK5      | protein kinase LYK5                                                   | <b>1,86</b> | <b>1,00E+00</b> | 9,92E-01 | <b>2,52</b> | <b>1,86E-02</b> |
| NM_007118 | TRIO      | triple functional domain (PTPRF interacting)                          | <b>2,51</b> | <b>1,00E+00</b> | 9,99E-01 | <b>5,30</b> | <b>8,26E-03</b> |
| XM_497921 | LOC391533 | similar to Vascular endothelial growth factor receptor 1 precursor (' | <b>2,32</b> | <b>1,00E+00</b> | 9,99E-01 | <b>3,15</b> | <b>8,26E-03</b> |
| NM_173598 | KSR2      | kinase suppressor of ras 2                                            | <b>2,31</b> | <b>1,00E+00</b> | 9,99E-01 | <b>3,28</b> | <b>8,26E-03</b> |
| NM_002929 | GRK1      | G protein-coupled receptor kinase 1                                   | <b>2,35</b> | <b>1,00E+00</b> | 9,99E-01 | <b>4,84</b> | <b>8,26E-03</b> |
| NM_182692 | SRPK2     | SFRS protein kinase 2                                                 | <b>2,44</b> | <b>1,00E+00</b> | 9,99E-01 | <b>5,82</b> | <b>8,26E-03</b> |
| NM_018979 | WNK1      | WNK lysine deficient protein kinase 1                                 | <b>2,22</b> | <b>1,00E+00</b> | 9,99E-01 | <b>5,53</b> | <b>8,26E-03</b> |
| NM_000604 | FGFR1     | fibroblast growth factor receptor 1 (fms-related tyrosine kinase 2, F | <b>1,92</b> | <b>1,00E+00</b> | 9,95E-01 | <b>4,01</b> | <b>8,26E-03</b> |
| NM_145059 | FUK       | fucokinase                                                            | <b>1,92</b> | <b>1,00E+00</b> | 9,95E-01 | <b>3,00</b> | <b>8,26E-03</b> |
| NM_014226 | RAGE      | renal tumor antigen                                                   | <b>1,95</b> | <b>1,00E+00</b> | 9,96E-01 | <b>4,04</b> | <b>8,26E-03</b> |
| NM_173354 | SNF1LK    | SNF1-like kinase                                                      | <b>2,15</b> | <b>1,00E+00</b> | 9,98E-01 | <b>3,55</b> | <b>8,26E-03</b> |
| NM_002037 | FYN       | FYN oncogene related to SRC, FGR, YES                                 | <b>2,47</b> | <b>1,00E+00</b> | 9,98E-01 | <b>3,84</b> | <b>8,26E-03</b> |
| NM_012474 | UCK2      | uridine-cytidine kinase 2                                             | <b>2,01</b> | <b>1,00E+00</b> | 9,96E-01 | <b>2,97</b> | <b>8,26E-03</b> |
| NM_144685 | HIPK4     | homeodomain interacting protein kinase 4                              | <b>2,00</b> | <b>1,00E+00</b> | 9,97E-01 | <b>2,60</b> | <b>8,26E-03</b> |
| NM_003845 | DYRK4     | dual-specificity tyrosine-(Y)-phosphorylation regulated kinase 4      | <b>2,52</b> | <b>1,00E+00</b> | 9,97E-01 | <b>5,02</b> | <b>1,86E-02</b> |
| NM_014916 | LMTK2     | lemur tyrosine kinase 2                                               | <b>2,26</b> | <b>1,00E+00</b> | 9,97E-01 | <b>2,72</b> | <b>8,26E-03</b> |
