# Supplementary material
Source: PubMed Central journal article supplement (PMC3938446)
Supplement: halms705829-supplement_3.pdf [file halms705829-supplement_3.pdf]

| ID        | Gene    | Name                                     | HCVpp<br>(fold change) | HCVpp<br>(fdr) | HCVpp<br>(P-value) | HCVcc<br>(fold change) | HCVcc<br>(fdr) | HCVcc<br>(P-value) | VSVpp<br>(fold change) | VSVpp<br>(fdr) | VSVpp<br>(P-value) | MTT<br>(fold change) | liver<br>expression | Validated by<br>individual siRNAs |
|-----------|---------|------------------------------------------|------------------------|----------------|--------------------|------------------------|----------------|--------------------|------------------------|----------------|--------------------|----------------------|---------------------|-----------------------------------|
| NM_001123 | ADK     | adenosine kinase                         | -3,18                  | 9,55E-04       | 5,26E-05           | -22,85                 | 8,55E-05       | 4,65E-05           | 1,44                   | 9,16E-02       | 1,01E-01           | 1,08                 | +++                 | 4/4                               |
| NM_001619 | ADRBK1  | adrenergic, beta, receptor kinase 1      | -2,96                  | 9,55E-04       | 1,02E-04           | -40,68                 | 8,55E-05       | 1,25E-05           | -1,08                  | 1,00E+00       | 6,49E-01           | -1,88                | ++                  | 3/4                               |
| NM_001743 | CALM2   | calmodulin 2 (phosphorylase kinase, i    | -2,97                  | 9,55E-04       | 9,31E-05           | -1,81                  | 3,59E-02       | 2,05E-02           | 2,26                   | 1,86E-02       | 1,35E-02           | -1,15                | ++                  | 2/4                               |
| NM_004064 | CDKN1B  | cyclin-dependent kinase inhibitor 1B (   | -3,05                  | 9,55E-04       | 7,08E-05           | -6,23                  | 8,55E-05       | 4,24E-05           | 1,18                   | 5,48E-01       | 3,65E-01           | 1,08                 | +                   | 2/4                               |
| NM_001826 | CKS1B   | CDC28 protein kinase regulatory sub      | -3,77                  | 4,41E-04       | 1,17E-05           | -17,78                 | 8,55E-05       | 3,19E-06           | 1,08                   | 1,00E+00       | 6,49E-01           | -1,22                | ++                  | 3/4                               |
| NM_006182 | DDR2    | discoidin domain receptor family, mer    | -3,27                  | 9,55E-04       | 5,95E-05           | -2,17                  | 3,59E-02       | 1,86E-02           | -1,10                  | 1,00E+00       | 5,87E-01           | -1,14                | ++                  | 2/4                               |
| NM_004431 | EPHA2   | EPH receptor A2                          | -3,05                  | 9,55E-04       | 7,37E-05           | -3,01                  | 8,92E-04       | 7,60E-04           | 1,19                   | 1,00E+00       | 4,89E-01           | 1,18                 | ++                  | 3/4                               |
| NM_005248 | FGR     | Gardner-Rasheed feline sarcoma vira      | -4,33                  | 4,81E-05       | 3,87E-06           | -2,31                  | 5,07E-03       | 2,69E-03           | 1,29                   | 2,61E-01       | 2,00E-01           | 1,23                 | +                   | 3/4                               |
| NM_005255 | GAK     | cyclin G associated kinase               | -2,95                  | 9,55E-04       | 9,53E-05           | -3,00                  | 5,07E-03       | 1,79E-03           | -1,00                  | 1,00E+00       | 9,54E-01           | -1,24                | ++                  | 3/4                               |
| NM_004517 | ILK     | integrin-linked kinase                   | -3,16                  | 9,55E-04       | 5,18E-05           | -2,15                  | 8,18E-03       | 6,37E-03           | 2,01                   | 2,38E-02       | 2,02E-02           | 1,09                 | ++                  | 2/4                               |
| NM_002220 | ITPKA   | inositol 1,4,5-trisphosphate 3-kinase /  | -4,75                  | 4,07E-05       | 2,63E-06           | -2,62                  | 7,26E-03       | 4,00E-03           | 1,05                   | 1,00E+00       | 8,09E-01           | -1,09                | ++                  | 2/4                               |
| NM_002749 | MAPK7   | mitogen-activated protein kinase 7       | -3,52                  | 9,55E-04       | 2,50E-05           | -1,94                  | 8,18E-03       | 5,52E-03           | -1,09                  | 1,00E+00       | 6,19E-01           | -1,09                | ++                  | 4/4                               |
| NM_152835 | PDIK1L  | PDLIM1 interacting kinase 1 like         | -3,16                  | 9,55E-04       | 5,85E-05           | -3,36                  | 8,92E-04       | 5,69E-04           | 1,29                   | 2,61E-01       | 1,93E-01           | 1,05                 | ++                  | 2/4                               |
| NM_004073 | PLK3    | polo-like kinase 3 (Drosophila)          | -3,48                  | 4,41E-04       | 2,29E-05           | -2,67                  | 7,26E-03       | 3,70E-03           | 1,19                   | 3,97E-01       | 3,29E-01           | -1,18                | ++                  | 2/4                               |
| NM_002744 | PRKCZ   | protein kinase C, zeta                   | -3,46                  | 4,41E-04       | 2,49E-05           | -1,77                  | 3,59E-02       | 1,80E-02           | -1,34                  | 2,61E-01       | 1,74E-01           | -1,46                | ++                  | 2/4                               |
| NM_000455 | STK11   | serine/threonine kinase 11 (Peutz-Jeç    | -3,50                  | 4,41E-04       | 2,19E-05           | -1,84                  | 1,38E-02       | 7,65E-03           | -1,10                  | 1,00E+00       | 5,56E-01           | 1,45                 | ++                  | 3/4                               |
| NM_003576 | STK24   | serine/threonine kinase 24 (STE20 hc     | -3,06                  | 9,55E-04       | 7,90E-05           | -3,51                  | 7,94E-04       | 2,83E-04           | 1,47                   | 2,61E-01       | 1,49E-01           | 1,10                 | ++                  | 2/4                               |
| NM_007271 | STK38   | serine/threonine kinase 38               | -4,10                  | 1,74E-04       | 7,29E-06           | -5,82                  | 7,94E-04       | 1,96E-04           | -1,08                  | 1,00E+00       | 6,35E-01           | -1,07                | ++                  | 3/4                               |
| NM_001106 | ACVR2B  | activin A receptor, type IIB             | -5,23                  | 4,07E-05       | 1,37E-06           | -3,68                  | 8,92E-04       | 3,01E-04           | -1,27                  | 3,97E-01       | 2,99E-01           | -1,26                | ++                  | 3/4                               |
| NM_005876 | APEG1   | aortic preferentially expressed protein  | -4,80                  | 4,07E-05       | 1,97E-06           | -17,59                 | 4,84E-04       | 1,60E-04           | -1,70                  | 7,71E-02       | 5,63E-02           | -1,14                | ++                  | 3/4                               |
| NM_000051 | ATM     | ataxia telangiectasia mutated            | -12,78                 | 1,71E-06       | 7,05E-08           | -7,60                  | 8,55E-05       | 4,38E-05           | -3,38                  | 3,88E-02       | 3,41E-02           | 1,01                 | +                   | 3/4                               |
| NM_004217 | AURKB   | aurora kinase B                          | -4,19                  | 1,74E-04       | 6,52E-06           | -9,76                  | 4,84E-04       | 1,31E-04           | -1,55                  | 7,71E-02       | 7,77E-02           | -1,33                | +                   | 2/4                               |
| NM_001721 | BMX     | BMX non-receptor tyrosine kinase         | -6,68                  | 9,22E-06       | 1,75E-07           | -5,35                  | 4,84E-04       | 1,75E-04           | -1,94                  | 2,38E-02       | 1,76E-02           | -1,49                | ++                  | 3/4                               |
| NM_004333 | BRAF    | v-rat murine sarcoma viral oncogene      | -13,34                 | 7,70E-07       | 9,10E-09           | -19,59                 | 8,55E-05       | 1,75E-05           | -3,15                  | 8,26E-03       | 3,75E-03           | -1,20                | ++                  | 2/4                               |
| NM_001786 | CDC2    | cell division cycle 2, G1 to S and G2 t  | -14,96                 | 1,06E-06       | 4,23E-08           | -2,26                  | 7,26E-03       | 5,23E-03           | -10,78                 | 8,26E-03       | 3,80E-04           | -1,02                | +                   | 4/4                               |
| NM_033487 | CDC2L1  | cell division cycle 2-like 1 (PITSLRE ç  | -8,13                  | 1,06E-06       | 5,43E-08           | -5,75                  | 8,92E-04       | 5,97E-04           | -5,76                  | 8,26E-03       | 9,07E-04           | -1,44                | +                   | 4/4                               |
| NM_000075 | CDK4    | cyclin-dependent kinase 4                | -9,76                  | 4,10E-06       | 7,62E-08           | -3,84                  | 8,92E-04       | 7,95E-04           | -3,93                  | 1,86E-02       | 1,30E-02           | -1,02                | ++                  | 3/4                               |
| NM_001260 | CDK8    | cyclin-dependent kinase 4                | -6,36                  | 1,34E-05       | 2,24E-07           | -3,16                  | 8,92E-04       | 7,01E-04           | -2,11                  | 2,16E-02       | 1,58E-02           | -1,11                | +                   | 4/4                               |
| NM_001277 | CHKA    | choline kinase alpha                     | -4,04                  | 1,74E-04       | 7,95E-06           | -8,65                  | 4,84E-04       | 4,81E-05           | -1,47                  | 1,56E-01       | 1,12E-01           | -1,98                | ++                  | 2/4                               |
| NM_005198 | CHKB    | choline kinase beta                      | -3,83                  | 1,74E-04       | 1,01E-05           | -2,46                  | 5,07E-03       | 1,70E-03           | -1,44                  | 9,16E-02       | 8,45E-02           | -1,02                | +                   | 3/4                               |
| NM_006383 | CIB2    | calcium and integrin binding family m    | -17,68                 | 6,36E-07       | 5,87E-10           | -11,25                 | 8,55E-05       | 2,11E-05           | -3,23                  | 8,26E-03       | 2,51E-03           | -1,20                | ++                  | 2/4                               |
| NM_020990 | CKMT1   | creatine kinase, mitochondrial 1 (ubiq   | -3,82                  | 2,64E-04       | 1,08E-05           | -3,22                  | 8,92E-04       | 8,11E-04           | -1,55                  | 7,71E-02       | 5,30E-02           | 1,07                 | +                   | 2/4                               |
| NM_004080 | DGKB    | diacylglycerol kinase, beta 90kDa        | -6,25                  | 1,48E-05       | 2,66E-07           | -6,70                  | 8,55E-05       | 4,03E-05           | -1,58                  | 7,71E-02       | 6,30E-02           | -1,01                | ++                  | 3/4                               |
| NM_005228 | EGFR    | epidermal growth factor receptor         | -4,39                  | 4,81E-05       | 3,42E-06           | -2,29                  | 5,07E-03       | 2,48E-03           | -1,53                  | 7,71E-02       | 7,93E-02           | 1,14                 | +++                 | 3/4                               |
| NM_005233 | EPHA3   | EPH receptor A3                          | -5,29                  | 3,51E-05       | 8,38E-07           | -2,61                  | 7,26E-03       | 5,35E-03           | -1,73                  | 7,71E-02       | 5,37E-02           | -1,09                | ++                  | 2/4                               |
| NM_004441 | EPHB1   | EPH receptor B1                          | -3,04                  | 9,55E-04       | 7,30E-05           | -7,19                  | 8,55E-05       | 3,61E-05           | -1,26                  | 2,77E-01       | 2,14E-01           | -1,22                | ++                  | 2/4                               |
| NM_005246 | FER     | fer (fps/fes related) tyrosine kinase (p | -5,48                  | 4,07E-05       | 1,07E-06           | -2,41                  | 5,07E-03       | 2,27E-03           | -1,49                  | 7,71E-02       | 7,08E-02           | -1,15                | ++                  | 2/4                               |
| NM_002011 | FGFR4   | fibroblast growth factor receptor 4      | -5,31                  | 3,51E-05       | 9,31E-07           | -20,16                 | 8,55E-05       | 2,94E-05           | -3,41                  | 8,26E-03       | 4,33E-03           | -1,57                | ++++                | 3/4                               |
| BF688722  | FLT3LG  | fms-related tyrosine kinase 3 ligand     | -9,48                  | 1,06E-06       | 3,81E-08           | -3,91                  | 8,92E-04       | 7,55E-04           | -2,40                  | 2,02E-02       | 1,48E-02           | -1,00                | ++                  | 4/4                               |
| NM_022158 | FN3K    | fructosamine 3 kinase                    | -65,79                 | 1,73E-07       | 6,68E-12           | -23,40                 | 2,55E-05       | 2,23E-06           | -10,39                 | 8,26E-03       | 3,27E-03           | -1,10                | ++                  | 2/4                               |
| NM_000162 | GCK     | glucokinase (hexokinase 4, maturity c    | -5,54                  | 4,07E-05       | 2,87E-06           | -99,58                 | 2,55E-05       | 9,56E-07           | -2,56                  | 7,71E-02       | 6,27E-02           | -1,43                | ++                  | 3/4                               |
| NM_025211 | GKAP1   | G kinase anchoring protein 1             | -4,28                  | 7,99E-05       | 4,16E-06           | -2,99                  | 8,92E-04       | 5,55E-04           | -1,23                  | 3,30E-01       | 2,61E-01           | 1,12                 | +                   | 2/4                               |
| NM_001556 | IKBK1   | inhibitor of kappa light polypeptide ge  | -4,36                  | 7,24E-05       | 3,92E-06           | -2,50                  | 7,26E-03       | 5,05E-03           | -1,84                  | 2,72E-02       | 2,13E-02           | -1,85                | +                   | 3/4                               |
| NM_024117 | MAPKAP1 | mitogen-activated protein kinase assc    | -5,11                  | 3,51E-05       | 1,06E-06           | -10,25                 | 8,55E-05       | 1,14E-05           | -1,78                  | 3,19E-02       | 2,42E-02           | 1,18                 | ++                  | 2/4                               |
| NM_033116 | NEK9    | NIMA (never in mitosis gene a)- relat    | -10,98                 | 6,36E-07       | 7,36E-09           | -11,60                 | 8,92E-04       | 5,16E-04           | -9,24                  | 8,26E-03       | 2,34E-04           | -1,34                | +                   | 3/4                               |
| NM_018425 | PI4KII  | phosphatidylinositol 4-kinase type II    | -9,49                  | 1,06E-06       | 1,94E-08           | -2,50                  | 7,26E-03       | 4,45E-03           | -3,67                  | 8,26E-03       | 1,71E-03           | 1,08                 | ++                  | 3/4                               |
| NM_005028 | PIPSK2A | phosphatidylinositol-4-phosphate 5-ki    | -4,85                  | 4,07E-05       | 1,93E-06           | -5,56                  | 4,84E-04       | 1,02E-04           | -1,48                  | 7,71E-02       | 7,00E-02           | -1,04                | ++                  | 3/4                               |
| NM_005030 | PLK1    | polo-like kinase 1 (Drosophila)          | -10,83                 | 4,07E-05       | 2,49E-06           | -3,01                  | 5,07E-03       | 1,14E-03           | -6,40                  | 4,31E-02       | 4,25E-02           | -0,90                | ++                  | 4/4                               |
| NM_016203 | PRKAG2  | protein kinase, AMP-activated, gamm      | -4,72                  | 4,07E-05       | 2,22E-06           | -4,35                  | 6,87E-03       | 2,70E-03           | -2,17                  | 2,38E-02       | 2,03E-02           | 1,02                 | ++                  | 4/4                               |
